# Supplementary material for: Depth drives the distribution of microbial ecological functions in the coastal western Antarctic Peninsula
Source: Front Microbiol. 2023 May 18;14:1168507. doi: 10.3389/fmicb.2023.1168507 (PMC10232865; doi:10.3389/fmicb.2023.1168507)
Supplement: Supplementary file 5 [file Table_4.XLSX]

## Sheet: Sheet1
user_genome	classification	fastani_reference	fastani_reference_radius	fastani_taxonomy	fastani_ani	fastani_af	closest_placement_reference	closest_placement_radius	closest_placement_taxonomy	closest_placement_ani	closest_placement_af	pplacer_taxonomy	classification_method	note	other_related_references(genome_id,species_name,radius,ANI,AF)	msa_percent	translation_table	red_value	warnings	classification	Phylum	Class	Order	Family	Genus	Species
LH5_3_35_bin.44	d__Archaea;p__Thermoplasmatota;c__Poseidoniia_A;o__Poseidoniales;f__Poseidoniaceae;g__MGIIa-L1;s__	N/A	N/A	N/A	N/A	N/A	N/A	N/A	N/A	N/A	N/A	d__Archaea;p__Thermoplasmatota;c__Poseidoniia_A;o__Poseidoniales;f__Poseidoniaceae;g__MGIIa-L1;s__	ANI	N/A	GCA_009937025.1, s__MGIIa-L1 sp009937025, 95.0, 79.37, 0.56; GCA_002170315.2, s__MGIIa-L1 sp002170315, 95.0, 78.87, 0.48; GCA_902520595.1, s__MGIIa-L1 sp902520595, 95.0, 78.67, 0.35; GCA_002499705.1, s__MGIIa-L1 sp002499705, 95.0, 78.5, 0.45; GCA_002506275.1, s__MGIIa-L1 sp002506275, 95.0, 78.04, 0.3; GCA_003602605.1, s__MGIIa-L1 sp003602605, 95.0, 77.88, 0.33; GCA_002687075.1, s__MGIIa-L1 sp0026…	74.73	11	0.964773	N/A	d__Archaea	p__Thermoplasmatota	c__Poseidoniia_A	o__Poseidoniales	f__Poseidoniaceae	g__MGIIa-L1	s__
LMG2001_200112_5_bin.21	d__Archaea;p__Thermoplasmatota;c__Poseidoniia_A;o__Poseidoniales;f__Poseidoniaceae;g__MGIIa-L1;s__	N/A	N/A	N/A	N/A	N/A	GCA_013329255.1	95	d__Archaea;p__Thermoplasmatota;c__Poseidoniia_A;o__Poseidoniales;f__Poseidoniaceae;g__MGIIa-L1;s__MGIIa-L1 sp9513u	80.05	0.58	d__Archaea;p__Thermoplasmatota;c__Poseidoniia_A;o__Poseidoniales;f__Poseidoniaceae;g__MGIIa-L1;s__	taxonomic classification defined by topology and ANI	N/A	GCA_013330285.1, s__MGIIa-L1 sp8160u, 95.0, 78.8, 0.43; GCA_000246735.1, s__MGIIa-L1 sp000246735, 95.0, 78.78, 0.45; GCA_002502605.1, s__MGIIa-L1 sp002502605, 95.0, 78.67, 0.42; GCA_002495535.1, s__MGIIa-L1 sp002495535, 95.0, 78.59, 0.48; GCA_009887095.1, s__MGIIa-L1 sp009887095, 95.0, 78.49, 0.43; GCA_003602645.1, s__MGIIa-L1 sp003602645, 95.0, 78.22, 0.41; GCA_002506275.1, s__MGIIa-L1 sp0025062…	77.75	11	0.963474	N/A	d__Archaea	p__Thermoplasmatota	c__Poseidoniia_A	o__Poseidoniales	f__Poseidoniaceae	g__MGIIa-L1	s__
LMG2001_200120_22_bin.7	d__Archaea;p__Thermoplasmatota;c__Poseidoniia_A;o__Poseidoniales;f__Poseidoniaceae;g__MGIIa-L1;s__	N/A	N/A	N/A	N/A	N/A	GCA_009937205.1	95	d__Archaea;p__Thermoplasmatota;c__Poseidoniia_A;o__Poseidoniales;f__Poseidoniaceae;g__MGIIa-L1;s__MGIIa-L1 sp009937205	93.4	0.88	d__Archaea;p__Thermoplasmatota;c__Poseidoniia_A;o__Poseidoniales;f__Poseidoniaceae;g__MGIIa-L1;s__	taxonomic classification defined by topology and ANI	N/A	GCA_002499015.1, s__MGIIa-L1 sp002499015, 95.0, 92.73, 0.87; GCA_012959845.1, s__MGIIa-L1 sp012959845, 95.0, 82.61, 0.78	76.97	11	0.988705	Genome not assigned to closest species as it falls outside its pre-defined ANI radius	d__Archaea	p__Thermoplasmatota	c__Poseidoniia_A	o__Poseidoniales	f__Poseidoniaceae	g__MGIIa-L1	s__
LH3_2_200_bin.120	d__Archaea;p__Thermoplasmatota;c__Poseidoniia_A;o__Poseidoniales;f__Thalassarchaeaceae;g__MGIIb-O1;s__MGIIb-O1 sp002498525	GCA_002498525.1	95	d__Archaea;p__Thermoplasmatota;c__Poseidoniia_A;o__Poseidoniales;f__Thalassarchaeaceae;g__MGIIb-O1;s__MGIIb-O1 sp002498525	97.8	0.96	GCA_002498525.1	95	d__Archaea;p__Thermoplasmatota;c__Poseidoniia_A;o__Poseidoniales;f__Thalassarchaeaceae;g__MGIIb-O1;s__MGIIb-O1 sp002498525	97.8	0.96	d__Archaea;p__Thermoplasmatota;c__Poseidoniia_A;o__Poseidoniales;f__Thalassarchaeaceae;g__MGIIb-O1;s__	taxonomic classification defined by topology and ANI	topological placement and ANI have congruent species assignments	GCA_013329905.1, s__MGIIb-O1 sp8684u, 95.0, 77.85, 0.32; GCA_002497895.1, s__MGIIb-O1 sp002497895, 95.0, 77.14, 0.32	75.27	11	N/A	N/A	d__Archaea	p__Thermoplasmatota	c__Poseidoniia_A	o__Poseidoniales	f__Thalassarchaeaceae	g__MGIIb-O1	s__MGIIb-O1 sp002498525
LH1_1_200_bin.124	d__Archaea;p__Thermoplasmatota;c__Poseidoniia_A;o__Poseidoniales;f__Thalassarchaeaceae;g__MGIIb-O2;s__	N/A	N/A	N/A	N/A	N/A	N/A	N/A	N/A	N/A	N/A	d__Archaea;p__Thermoplasmatota;c__Poseidoniia_A;o__Poseidoniales;f__Thalassarchaeaceae;g__MGIIb-O2;s__	ANI	N/A	GCA_002494975.1, s__MGIIb-O2 sp002494975, 95.0, 79.51, 0.48; GCA_902511005.1, s__MGIIb-O2 sp902511005, 95.0, 79.42, 0.49; GCA_902514485.1, s__MGIIb-O2 sp902514485, 95.0, 79.21, 0.48; GCA_002497245.1, s__MGIIb-O2 sp002497245, 95.0, 77.7, 0.34; GCA_902593945.1, s__MGIIb-O2 sp902593945, 95.0, 77.67, 0.34; GCA_002685315.1, s__MGIIb-O2 sp002685315, 95.0, 77.63, 0.31; GCA_002504905.1, s__MGIIb-O2 sp002…	57.98	11	0.957572	N/A	d__Archaea	p__Thermoplasmatota	c__Poseidoniia_A	o__Poseidoniales	f__Thalassarchaeaceae	g__MGIIb-O2	s__
LMG2001_200120_22_bin.61	d__Archaea;p__Thermoplasmatota;c__Poseidoniia_A;o__Poseidoniales;f__Thalassarchaeaceae;g__MGIIb-P;s__	N/A	N/A	N/A	N/A	N/A	GCA_002457195.1	95	d__Archaea;p__Thermoplasmatota;c__Poseidoniia_A;o__Poseidoniales;f__Thalassarchaeaceae;g__MGIIb-P;s__MGIIb-P sp002457195	79.02	0.43	d__Archaea;p__Thermoplasmatota;c__Poseidoniia_A;o__Poseidoniales;f__Thalassarchaeaceae;g__MGIIb-P;s__	taxonomic classification defined by topology and ANI	N/A	GCA_002498455.1, s__MGIIb-P sp002498455, 95.0, 77.18, 0.23; GCA_002724815.1, s__MGIIb-P sp002724815, 95.0, 77.17, 0.23; GCA_002505685.1, s__MGIIb-P sp002505685, 95.0, 76.69, 0.24	69.07	11	0.945791	N/A	d__Archaea	p__Thermoplasmatota	c__Poseidoniia_A	o__Poseidoniales	f__Thalassarchaeaceae	g__MGIIb-P	s__
LMG2001_200120_22_bin.77	d__Archaea;p__Thermoplasmatota;c__Poseidoniia_A;o__Poseidoniales;f__Thalassarchaeaceae;g__MGIIb-P;s__	N/A	N/A	N/A	N/A	N/A	GCA_002457195.1	95	d__Archaea;p__Thermoplasmatota;c__Poseidoniia_A;o__Poseidoniales;f__Thalassarchaeaceae;g__MGIIb-P;s__MGIIb-P sp002457195	77.87	0.35	d__Archaea;p__Thermoplasmatota;c__Poseidoniia_A;o__Poseidoniales;f__Thalassarchaeaceae;g__MGIIb-P;s__	taxonomic classification defined by topology and ANI	N/A	GCA_002498455.1, s__MGIIb-P sp002498455, 95.0, 76.98, 0.2; GCA_002505685.1, s__MGIIb-P sp002505685, 95.0, 76.78, 0.27; GCA_002724815.1, s__MGIIb-P sp002724815, 95.0, 76.77, 0.21	71.55	11	0.93393	N/A	d__Archaea	p__Thermoplasmatota	c__Poseidoniia_A	o__Poseidoniales	f__Thalassarchaeaceae	g__MGIIb-P	s__
LMG2001_200120_22_bin.6	d__Archaea;p__Thermoplasmatota;c__Poseidoniia_A;o__Poseidoniales;f__Thalassarchaeaceae;g__Thalassarchaeum;s__Thalassarchaeum sp002495735	GCA_002495735.1	95	d__Archaea;p__Thermoplasmatota;c__Poseidoniia_A;o__Poseidoniales;f__Thalassarchaeaceae;g__Thalassarchaeum;s__Thalassarchaeum sp002495735	99.28	0.87	GCA_002495735.1	95	d__Archaea;p__Thermoplasmatota;c__Poseidoniia_A;o__Poseidoniales;f__Thalassarchaeaceae;g__Thalassarchaeum;s__Thalassarchaeum sp002495735	99.28	0.87	d__Archaea;p__Thermoplasmatota;c__Poseidoniia_A;o__Poseidoniales;f__Thalassarchaeaceae;g__Thalassarchaeum;s__	taxonomic classification defined by topology and ANI	topological placement and ANI have congruent species assignments	GCA_004195715.1, s__Thalassarchaeum sp004195715, 95.0, 93.8, 0.95; GCA_002457605.1, s__Thalassarchaeum sp002457605, 95.0, 89.02, 0.84; GCA_002505325.1, s__Thalassarchaeum sp002505325, 95.0, 88.76, 0.82; GCA_014240285.1, s__Thalassarchaeum sp014240285, 95.0, 85.98, 0.79; GCA_002507125.1, s__Thalassarchaeum sp002507125, 95.0, 80.4, 0.54; GCA_003193925.1, s__Thalassarchaeum betae, 95.0, 78.79, 0.48;…	76.78	11	N/A	N/A	d__Archaea	p__Thermoplasmatota	c__Poseidoniia_A	o__Poseidoniales	f__Thalassarchaeaceae	g__Thalassarchaeum	s__Thalassarchaeum sp002495735
LMG2001_200120_22_bin.15	d__Archaea;p__Thermoplasmatota;c__Poseidoniia_B;o__MGIII;f__CG-Epi1;g__CG-Epi1;s__	N/A	N/A	N/A	N/A	N/A	GCA_014240255.1	95	d__Archaea;p__Thermoplasmatota;c__Poseidoniia_B;o__MGIII;f__CG-Epi1;g__CG-Epi1;s__CG-Epi1 sp014240255	88.75	0.75	d__Archaea;p__Thermoplasmatota;c__Poseidoniia_B;o__MGIII;f__CG-Epi1;g__CG-Epi1;s__	taxonomic classification defined by topology and ANI	N/A	GCA_014240055.1, s__CG-Epi1 sp014240055, 95.0, 84.07, 0.69; GCA_902533295.1, s__CG-Epi1 sp902533295, 95.0, 78.56, 0.35; GCA_902531985.1, s__CG-Epi1 sp902531985, 95.0, 78.14, 0.3; GCA_002718915.1, s__CG-Epi1 sp002718915, 95.0, 77.81, 0.24; GCA_002506485.1, s__CG-Epi1 sp002506485, 95.0, 77.64, 0.19; GCA_001875345.1, s__CG-Epi1 sp001875345, 95.0, 77.53, 0.23; GCA_902627615.1, s__CG-Epi1 sp902627615,…	81.75	11	0.97959	Genome not assigned to closest species as it falls outside its pre-defined ANI radius	d__Archaea	p__Thermoplasmatota	c__Poseidoniia_B	o__MGIII	f__CG-Epi1	g__CG-Epi1	s__
LMG2001_200112_5_bin.43	d__Archaea;p__Thermoproteota;c__Nitrososphaeria;o__Nitrososphaerales;f__Nitrosopumilaceae;g__Nitrosopumilus;s__	N/A	N/A	N/A	N/A	N/A	GCA_014384445.1	95	d__Archaea;p__Thermoproteota;c__Nitrososphaeria;o__Nitrososphaerales;f__Nitrosopumilaceae;g__Nitrosopumilus;s__Nitrosopumilus sp014384445	93.04	0.72	d__Archaea;p__Thermoproteota;c__Nitrososphaeria;o__Nitrososphaerales;f__Nitrosopumilaceae;g__Nitrosopumilus;s__	taxonomic classification defined by topology and ANI	N/A	GCA_001437625.1, s__Nitrosopumilus sp001437625, 95.0, 94.29, 0.85; GCA_902514095.1, s__Nitrosopumilus sp902514095, 95.0, 88.54, 0.7; GCA_902514275.1, s__Nitrosopumilus sp902514275, 95.0, 87.12, 0.68; GCA_002737455.1, s__Nitrosopumilus sp002737455, 95.0, 86.67, 0.9; GCA_003331425.1, s__Nitrosopumilus sp002690535, 95.0, 85.76, 0.95; GCF_002156965.1, s__Nitrosopumilus catalinensis, 95.0, 85.5, 0.96;…	50.88	11	0.998363	Genome not assigned to closest species as it falls outside its pre-defined ANI radius	d__Archaea	p__Thermoproteota	c__Nitrososphaeria	o__Nitrososphaerales	f__Nitrosopumilaceae	g__Nitrosopumilus	s__
LMG2001_200115_16_bin.61	d__Bacteria;p__Acidobacteriota;c__Vicinamibacteria;o__Vicinamibacterales;f__UBA8438;g__UBA8438;s__	N/A	N/A	N/A	N/A	N/A	GCA_005778315.1	95	d__Bacteria;p__Acidobacteriota;c__Vicinamibacteria;o__Vicinamibacterales;f__UBA8438;g__UBA8438;s__UBA8438 sp005778315	78.63	0.38	d__Bacteria;p__Acidobacteriota;c__Vicinamibacteria;o__Vicinamibacterales;f__UBA8438;g__UBA8438;s__	taxonomic classification defined by topology and ANI	N/A	GCA_002712885.1, s__UBA8438 sp002712885, 95.0, 79.52, 0.57; GCA_002726085.1, s__UBA8438 sp002726085, 95.0, 76.92, 0.25	77.67	11	0.948863	N/A	d__Bacteria	p__Acidobacteriota	c__Vicinamibacteria	o__Vicinamibacterales	f__UBA8438	g__UBA8438	s__
LMG2001_200120_10_bin.40	d__Bacteria;p__Actinobacteriota;c__Acidimicrobiia;o__Acidimicrobiales;f__JACDCH01;g__;s__	N/A	N/A	N/A	N/A	N/A	N/A	N/A	N/A	N/A	N/A	d__Bacteria;p__Actinobacteriota;c__Acidimicrobiia;o__Acidimicrobiales;f__JACDCH01;g__;s__	taxonomic novelty determined using RED	N/A	N/A	88.45	11	0.805808	N/A	d__Bacteria	p__Actinobacteriota	c__Acidimicrobiia	o__Acidimicrobiales	f__JACDCH01	g__	s__
LH3_1_75_bin.104	d__Bacteria;p__Actinobacteriota;c__Acidimicrobiia;o__Acidimicrobiales;f__MedAcidi-G1;g__MedAcidi-G2B;s__	N/A	N/A	N/A	N/A	N/A	GCA_012959995.1	95	d__Bacteria;p__Actinobacteriota;c__Acidimicrobiia;o__Acidimicrobiales;f__MedAcidi-G1;g__MedAcidi-G2B;s__MedAcidi-G2B sp012959995	91.27	0.92	d__Bacteria;p__Actinobacteriota;c__Acidimicrobiia;o__Acidimicrobiales;f__MedAcidi-G1;g__MedAcidi-G2B;s__	taxonomic classification defined by topology and ANI	N/A	N/A	92.97	11	0.986506	Genome not assigned to closest species as it falls outside its pre-defined ANI radius	d__Bacteria	p__Actinobacteriota	c__Acidimicrobiia	o__Acidimicrobiales	f__MedAcidi-G1	g__MedAcidi-G2B	s__
LMG2001_200120_22_bin.11	d__Bacteria;p__Actinobacteriota;c__Acidimicrobiia;o__Acidimicrobiales;f__MedAcidi-G1;g__S20-B6;s__S20-B6 sp002699725	GCA_002699725.1	95	d__Bacteria;p__Actinobacteriota;c__Acidimicrobiia;o__Acidimicrobiales;f__MedAcidi-G1;g__S20-B6;s__S20-B6 sp002699725	97.29	0.86	GCA_002699725.1	95	d__Bacteria;p__Actinobacteriota;c__Acidimicrobiia;o__Acidimicrobiales;f__MedAcidi-G1;g__S20-B6;s__S20-B6 sp002699725	97.29	0.86	d__Bacteria;p__Actinobacteriota;c__Acidimicrobiia;o__Acidimicrobiales;f__MedAcidi-G1;g__S20-B6;s__	taxonomic classification defined by topology and ANI	topological placement and ANI have congruent species assignments	GCA_002329075.1, s__S20-B6 sp002329075, 95.0, 87.77, 0.81; GCA_014381945.1, s__S20-B6 sp014381945, 95.0, 86.47, 0.85; GCA_002346745.1, s__S20-B6 sp002346745, 95.0, 83.11, 0.72	89.44	11	N/A	N/A	d__Bacteria	p__Actinobacteriota	c__Acidimicrobiia	o__Acidimicrobiales	f__MedAcidi-G1	g__S20-B6	s__S20-B6 sp002699725
LH5_1_200_bin.83	d__Bacteria;p__Actinobacteriota;c__Acidimicrobiia;o__Acidimicrobiales;f__MedAcidi-G1;g__UBA9410;s__UBA9410 sp012961035	GCA_012961035.1	95	d__Bacteria;p__Actinobacteriota;c__Acidimicrobiia;o__Acidimicrobiales;f__MedAcidi-G1;g__UBA9410;s__UBA9410 sp012961035	98.08	0.88	GCA_012961035.1	95	d__Bacteria;p__Actinobacteriota;c__Acidimicrobiia;o__Acidimicrobiales;f__MedAcidi-G1;g__UBA9410;s__UBA9410 sp012961035	98.08	0.88	d__Bacteria;p__Actinobacteriota;c__Acidimicrobiia;o__Acidimicrobiales;f__MedAcidi-G1;g__UBA9410;s__	taxonomic classification defined by topology and ANI	topological placement and ANI have congruent species assignments	GCA_014240365.1, s__UBA9410 sp014240365, 95.0, 89.65, 0.83; GCA_014239855.1, s__UBA9410 sp014239855, 95.0, 80.24, 0.64; GCA_002727895.1, s__UBA9410 sp002727895, 95.0, 80.0, 0.48; GCA_014237715.1, s__UBA9410 sp014237715, 95.0, 79.22, 0.59; GCA_002717365.1, s__UBA9410 sp002717365, 95.0, 79.22, 0.42; GCA_003541675.1, s__UBA9410 sp003541675, 95.0, 78.71, 0.36; GCA_002714485.1, s__UBA9410 sp002714485,…	76.83	11	N/A	N/A	d__Bacteria	p__Actinobacteriota	c__Acidimicrobiia	o__Acidimicrobiales	f__MedAcidi-G1	g__UBA9410	s__UBA9410 sp012961035
LMG2001_200112_6_bin.61	d__Bacteria;p__Actinobacteriota;c__Acidimicrobiia;o__Acidimicrobiales;f__MedAcidi-G1;g__UBA9410;s__UBA9410 sp014240365	GCA_014240365.1	95	d__Bacteria;p__Actinobacteriota;c__Acidimicrobiia;o__Acidimicrobiales;f__MedAcidi-G1;g__UBA9410;s__UBA9410 sp014240365	98.33	0.89	GCA_014240365.1	95	d__Bacteria;p__Actinobacteriota;c__Acidimicrobiia;o__Acidimicrobiales;f__MedAcidi-G1;g__UBA9410;s__UBA9410 sp014240365	98.33	0.89	d__Bacteria;p__Actinobacteriota;c__Acidimicrobiia;o__Acidimicrobiales;f__MedAcidi-G1;g__UBA9410;s__	taxonomic classification defined by topology and ANI	topological placement and ANI have congruent species assignments	GCA_012961035.1, s__UBA9410 sp012961035, 95.0, 89.26, 0.86; GCA_014239855.1, s__UBA9410 sp014239855, 95.0, 80.1, 0.63; GCA_002727895.1, s__UBA9410 sp002727895, 95.0, 79.66, 0.51; GCA_014237715.1, s__UBA9410 sp014237715, 95.0, 79.58, 0.61; GCA_003541675.1, s__UBA9410 sp003541675, 95.0, 79.05, 0.48; GCA_002717365.1, s__UBA9410 sp002717365, 95.0, 78.94, 0.42; GCA_002714485.1, s__UBA9410 sp002714485,…	90.73	11	N/A	N/A	d__Bacteria	p__Actinobacteriota	c__Acidimicrobiia	o__Acidimicrobiales	f__MedAcidi-G1	g__UBA9410	s__UBA9410 sp014240365
LH5_2_200_bin.54	d__Bacteria;p__Actinobacteriota;c__Acidimicrobiia;o__Acidimicrobiales;f__TK06;g__UBA2110;s__UBA2110 sp002331465	GCA_002331465.1	95	d__Bacteria;p__Actinobacteriota;c__Acidimicrobiia;o__Acidimicrobiales;f__TK06;g__UBA2110;s__UBA2110 sp002331465	96.9	0.84	GCA_002331465.1	95	d__Bacteria;p__Actinobacteriota;c__Acidimicrobiia;o__Acidimicrobiales;f__TK06;g__UBA2110;s__UBA2110 sp002331465	96.9	0.84	d__Bacteria;p__Actinobacteriota;c__Acidimicrobiia;o__Acidimicrobiales;f__TK06;g__UBA2110;s__	taxonomic classification defined by topology and ANI	topological placement and ANI have congruent species assignments	GCA_012960315.1, s__UBA2110 sp012960315, 95.0, 94.28, 0.88; GCA_014239555.1, s__UBA2110 sp014239555, 95.0, 90.38, 0.89; GCA_002719335.1, s__UBA2110 sp002719335, 95.0, 84.55, 0.67; GCA_002388005.1, s__UBA2110 sp002388005, 95.0, 79.06, 0.49; GCA_002705305.1, s__UBA2110 sp002705305, 95.0, 78.4, 0.44	88.54	11	N/A	N/A	d__Bacteria	p__Actinobacteriota	c__Acidimicrobiia	o__Acidimicrobiales	f__TK06	g__UBA2110	s__UBA2110 sp002331465
LMG2001_200112_5_bin.25	d__Bacteria;p__Actinobacteriota;c__Acidimicrobiia;o__Acidimicrobiales;f__TK06;g__UBA9040;s__	N/A	N/A	N/A	N/A	N/A	N/A	N/A	N/A	N/A	N/A	d__Bacteria;p__Actinobacteriota;c__Acidimicrobiia;o__Acidimicrobiales;f__TK06;g__;s__	taxonomic novelty determined using RED	N/A	N/A	90.09	11	0.983837	N/A	d__Bacteria	p__Actinobacteriota	c__Acidimicrobiia	o__Acidimicrobiales	f__TK06	g__UBA9040	s__
LH5_3_35_bin.17	d__Bacteria;p__Actinobacteriota;c__Actinomycetia;o__Actinomycetales;f__Microbacteriaceae;g__Aquiluna;s__	N/A	N/A	N/A	N/A	N/A	GCF_000257665.1	95	d__Bacteria;p__Actinobacteriota;c__Actinomycetia;o__Actinomycetales;f__Microbacteriaceae;g__Aquiluna;s__Aquiluna sp000257665	87.43	0.88	d__Bacteria;p__Actinobacteriota;c__Actinomycetia;o__Actinomycetales;f__Microbacteriaceae;g__Aquiluna;s__	taxonomic classification defined by topology and ANI	N/A	GCA_002390305.1, s__Aquiluna sp002390305, 95.0, 79.17, 0.29; GCA_002333405.1, s__Aquiluna sp002333405, 95.0, 78.61, 0.33	95.65	11	0.996358	Genome not assigned to closest species as it falls outside its pre-defined ANI radius	d__Bacteria	p__Actinobacteriota	c__Actinomycetia	o__Actinomycetales	f__Microbacteriaceae	g__Aquiluna	s__
LH1_2_35_bin.11	d__Bacteria;p__Actinobacteriota;c__Actinomycetia;o__Nanopelagicales;f__S36-B12;g__UBA4592;s__	N/A	N/A	N/A	N/A	N/A	GCA_002390705.1	95	d__Bacteria;p__Actinobacteriota;c__Actinomycetia;o__Nanopelagicales;f__S36-B12;g__UBA4592;s__UBA4592 sp002390705	91.36	0.69	d__Bacteria;p__Actinobacteriota;c__Actinomycetia;o__Nanopelagicales;f__S36-B12;g__UBA4592;s__	taxonomic classification defined by topology and ANI	N/A	GCA_002365735.1, s__UBA4592 sp002365735, 95.0, 89.06, 0.66	74.89	11	0.990168	Genome not assigned to closest species as it falls outside its pre-defined ANI radius	d__Bacteria	p__Actinobacteriota	c__Actinomycetia	o__Nanopelagicales	f__S36-B12	g__UBA4592	s__
LH1_2_35_bin.71	d__Bacteria;p__Actinobacteriota;c__Actinomycetia;o__Nanopelagicales;f__S36-B12;g__UBA4592;s__UBA4592 sp002365735	GCA_002365735.1	95	d__Bacteria;p__Actinobacteriota;c__Actinomycetia;o__Nanopelagicales;f__S36-B12;g__UBA4592;s__UBA4592 sp002365735	96.78	0.76	GCA_002365735.1	95	d__Bacteria;p__Actinobacteriota;c__Actinomycetia;o__Nanopelagicales;f__S36-B12;g__UBA4592;s__UBA4592 sp002365735	96.78	0.76	d__Bacteria;p__Actinobacteriota;c__Actinomycetia;o__Nanopelagicales;f__S36-B12;g__UBA4592;s__	taxonomic classification defined by topology and ANI	topological placement and ANI have congruent species assignments	GCA_002390705.1, s__UBA4592 sp002390705, 95.0, 88.26, 0.82; GCA_002469525.1, s__UBA4592 sp002469525, 95.0, 80.04, 0.22	86.4	11	N/A	N/A	d__Bacteria	p__Actinobacteriota	c__Actinomycetia	o__Nanopelagicales	f__S36-B12	g__UBA4592	s__UBA4592 sp002365735
LMG2001_200120_10_bin.87	d__Bacteria;p__Actinobacteriota;c__Actinomycetia;o__Propionibacteriales;f__Nocardioidaceae;g__Nocardioides;s__Nocardioides sp002698575	GCA_002698575.1	95	d__Bacteria;p__Actinobacteriota;c__Actinomycetia;o__Propionibacteriales;f__Nocardioidaceae;g__Nocardioides;s__Nocardioides sp002698575	98.69	0.81	GCA_002698575.1	95	d__Bacteria;p__Actinobacteriota;c__Actinomycetia;o__Propionibacteriales;f__Nocardioidaceae;g__Nocardioides;s__Nocardioides sp002698575	98.69	0.81	d__Bacteria;p__Actinobacteriota;c__Actinomycetia;o__Propionibacteriales;f__Nocardioidaceae;g__Nocardioides;s__	taxonomic classification defined by topology and ANI	topological placement and ANI have congruent species assignments	GCF_008087085.1, s__Nocardioides rubriscoriae, 95.0, 82.18, 0.63; GCF_005954645.2, s__Nocardioides dongxiaopingii, 95.0, 82.09, 0.57; GCF_006346395.1, s__Nocardioides plantarum, 95.0, 81.99, 0.62; GCF_004522105.1, s__Nocardioides sp004522105, 95.0, 81.81, 0.59; GCF_006346315.1, s__Nocardioides litoris, 95.0, 81.59, 0.59; GCF_013466785.1, s__Nocardioides marinisabuli, 95.0, 81.5, 0.54; GCA_0016273…	91.01	11	N/A	N/A	d__Bacteria	p__Actinobacteriota	c__Actinomycetia	o__Propionibacteriales	f__Nocardioidaceae	g__Nocardioides	s__Nocardioides sp002698575
LMG1901_190113_2_bin.7	d__Bacteria;p__Bacteroidota;c__Bacteroidia;o__Chitinophagales;f__Saprospiraceae;g__Lewinella_A;s__	N/A	N/A	N/A	N/A	N/A	GCF_008014675.1	95	d__Bacteria;p__Bacteroidota;c__Bacteroidia;o__Chitinophagales;f__Saprospiraceae;g__Lewinella_A;s__Lewinella_A sp008014675	78.62	0.48	d__Bacteria;p__Bacteroidota;c__Bacteroidia;o__Chitinophagales;f__Saprospiraceae;g__Lewinella_A;s__	taxonomic classification defined by topology and ANI	N/A	GCF_000373105.1, s__Lewinella_A persica, 95.0, 77.29, 0.28; GCF_900110645.1, s__Lewinella_A agarilytica, 95.0, 77.16, 0.21; GCF_014349155.1, s__Lewinella_A lacunae, 95.0, 76.53, 0.21	91.8	11	0.99095	N/A	d__Bacteria	p__Bacteroidota	c__Bacteroidia	o__Chitinophagales	f__Saprospiraceae	g__Lewinella_A	s__
LMG2001_200120_22_bin.65	d__Bacteria;p__Bacteroidota;c__Bacteroidia;o__Flavobacteriales;f__Flavobacteriaceae;g__Dokdonia;s__Dokdonia donghaensis	GCF_001653755.1	95	d__Bacteria;p__Bacteroidota;c__Bacteroidia;o__Flavobacteriales;f__Flavobacteriaceae;g__Dokdonia;s__Dokdonia donghaensis	95.74	0.98	GCF_001653755.1	95	d__Bacteria;p__Bacteroidota;c__Bacteroidia;o__Flavobacteriales;f__Flavobacteriaceae;g__Dokdonia;s__Dokdonia donghaensis	95.74	0.98	d__Bacteria;p__Bacteroidota;c__Bacteroidia;o__Flavobacteriales;f__Flavobacteriaceae;g__Dokdonia;s__	taxonomic classification defined by topology and ANI	topological placement and ANI have congruent species assignments	GCF_000355805.1, s__Dokdonia sp000355805, 95.0, 85.11, 0.75; GCF_000212355.1, s__Dokdonia sp000212355, 95.0, 81.69, 0.75; GCF_003095655.1, s__Dokdonia sp003095655, 95.0, 81.6, 0.74; GCF_007827465.1, s__Dokdonia sp007827465, 95.0, 79.05, 0.37; GCF_003688895.1, s__Dokdonia sinensis, 95.0, 77.73, 0.35; GCF_900188275.1, s__Dokdonia pacifica, 95.0, 77.19, 0.28	77.65	11	N/A	N/A	d__Bacteria	p__Bacteroidota	c__Bacteroidia	o__Flavobacteriales	f__Flavobacteriaceae	g__Dokdonia	s__Dokdonia donghaensis
depth4_bin.3	d__Bacteria;p__Bacteroidota;c__Bacteroidia;o__Flavobacteriales;f__Flavobacteriaceae;g__SGZJ01;s__	N/A	N/A	N/A	N/A	N/A	N/A	N/A	N/A	N/A	N/A	d__Bacteria;p__Bacteroidota;c__Bacteroidia;o__Flavobacteriales;f__Flavobacteriaceae;g__;s__	taxonomic novelty determined using RED	N/A	N/A	75.84	11	0.95245	N/A	d__Bacteria	p__Bacteroidota	c__Bacteroidia	o__Flavobacteriales	f__Flavobacteriaceae	g__SGZJ01	s__
LMG2001_200120_18_bin.38	d__Bacteria;p__Bacteroidota;c__Bacteroidia;o__Flavobacteriales;f__Flavobacteriaceae;g__Ulvibacter_B;s__Ulvibacter_B sp003450155	GCA_003450155.1	95	d__Bacteria;p__Bacteroidota;c__Bacteroidia;o__Flavobacteriales;f__Flavobacteriaceae;g__Ulvibacter_B;s__Ulvibacter_B sp003450155	99.5	0.84	GCA_003450155.1	95	d__Bacteria;p__Bacteroidota;c__Bacteroidia;o__Flavobacteriales;f__Flavobacteriaceae;g__Ulvibacter_B;s__Ulvibacter_B sp003450155	99.5	0.84	d__Bacteria;p__Bacteroidota;c__Bacteroidia;o__Flavobacteriales;f__Flavobacteriaceae;g__Ulvibacter_B;s__	taxonomic classification defined by topology and ANI	topological placement and ANI have congruent species assignments	GCF_008974325.1, s__Ulvibacter_B marinus, 95.0, 77.86, 0.25; GCF_009014635.1, s__Ulvibacter_B sp009014635, 95.0, 77.74, 0.29; GCA_000170815.1, s__Ulvibacter_B sp000170815, 95.0, 77.29, 0.24	88.35	11	N/A	N/A	d__Bacteria	p__Bacteroidota	c__Bacteroidia	o__Flavobacteriales	f__Flavobacteriaceae	g__Ulvibacter_B	s__Ulvibacter_B sp003450155
LMG2001_200120_18_bin.13	d__Bacteria;p__Bacteroidota;c__Bacteroidia;o__Flavobacteriales;f__Salibacteraceae;g__UBA6770;s__UBA6770 sp002453255	GCA_002453255.1	95	d__Bacteria;p__Bacteroidota;c__Bacteroidia;o__Flavobacteriales;f__Salibacteraceae;g__UBA6770;s__UBA6770 sp002453255	99.8	0.93	GCA_002453255.1	95	d__Bacteria;p__Bacteroidota;c__Bacteroidia;o__Flavobacteriales;f__Salibacteraceae;g__UBA6770;s__UBA6770 sp002453255	99.8	0.93	d__Bacteria;p__Bacteroidota;c__Bacteroidia;o__Flavobacteriales;f__Salibacteraceae;g__UBA6770;s__	taxonomic classification defined by topology and ANI	topological placement and ANI have congruent species assignments	GCA_002707155.1, s__UBA6770 sp002707155, 95.0, 79.69, 0.55	91.15	11	N/A	N/A	d__Bacteria	p__Bacteroidota	c__Bacteroidia	o__Flavobacteriales	f__Salibacteraceae	g__UBA6770	s__UBA6770 sp002453255
170123_PAL_Sterivex_14_bin.8	d__Bacteria;p__Bacteroidota;c__Bacteroidia;o__Flavobacteriales;f__Schleiferiaceae;g__UBA10364;s__UBA10364 sp003487785	GCA_003487785.1	95	d__Bacteria;p__Bacteroidota;c__Bacteroidia;o__Flavobacteriales;f__Schleiferiaceae;g__UBA10364;s__UBA10364 sp003487785	95.43	0.69	GCA_003487785.1	95	d__Bacteria;p__Bacteroidota;c__Bacteroidia;o__Flavobacteriales;f__Schleiferiaceae;g__UBA10364;s__UBA10364 sp003487785	95.43	0.69	d__Bacteria;p__Bacteroidota;c__Bacteroidia;o__Flavobacteriales;f__Schleiferiaceae;g__UBA10364;s__	taxonomic classification defined by topology and ANI	topological placement and ANI have congruent species assignments	N/A	87.43	11	N/A	N/A	d__Bacteria	p__Bacteroidota	c__Bacteroidia	o__Flavobacteriales	f__Schleiferiaceae	g__UBA10364	s__UBA10364 sp003487785
LMG2001_200120_10_bin.45	d__Bacteria;p__Bacteroidota;c__Bacteroidia;o__Flavobacteriales;f__Schleiferiaceae;g__UBA3442;s__UBA3442 sp002378565	GCA_002378565.1	95	d__Bacteria;p__Bacteroidota;c__Bacteroidia;o__Flavobacteriales;f__Schleiferiaceae;g__UBA3442;s__UBA3442 sp002378565	95.62	0.91	GCA_002378565.1	95	d__Bacteria;p__Bacteroidota;c__Bacteroidia;o__Flavobacteriales;f__Schleiferiaceae;g__UBA3442;s__UBA3442 sp002378565	95.62	0.91	d__Bacteria;p__Bacteroidota;c__Bacteroidia;o__Flavobacteriales;f__Schleiferiaceae;g__;s__	taxonomic classification defined by topology and ANI	topological placement and ANI have congruent species assignments	N/A	93.37	11	N/A	N/A	d__Bacteria	p__Bacteroidota	c__Bacteroidia	o__Flavobacteriales	f__Schleiferiaceae	g__UBA3442	s__UBA3442 sp002378565
LH1_2_35_bin.37	d__Bacteria;p__Bacteroidota;c__Bacteroidia;o__Flavobacteriales;f__UA16;g__UA16;s__	N/A	N/A	N/A	N/A	N/A	GCA_002390615.1	95	d__Bacteria;p__Bacteroidota;c__Bacteroidia;o__Flavobacteriales;f__UA16;g__UA16;s__UA16 sp002390615	87.47	0.77	d__Bacteria;p__Bacteroidota;c__Bacteroidia;o__Flavobacteriales;f__UA16;g__UA16;s__	taxonomic classification defined by topology and ANI	N/A	N/A	67.6	11	0.992052	Genome not assigned to closest species as it falls outside its pre-defined ANI radius	d__Bacteria	p__Bacteroidota	c__Bacteroidia	o__Flavobacteriales	f__UA16	g__UA16	s__
LH5_1_200_bin.71	d__Bacteria;p__Bacteroidota;c__Bacteroidia;o__Flavobacteriales;f__UA16;g__UA16;s__	N/A	N/A	N/A	N/A	N/A	N/A	N/A	N/A	N/A	N/A	d__Bacteria;p__Bacteroidota;c__Bacteroidia;o__Flavobacteriales;f__UA16;g__UA16;s__	taxonomic classification fully defined by topology	N/A	N/A	88.94	11	0.954859	N/A	d__Bacteria	p__Bacteroidota	c__Bacteroidia	o__Flavobacteriales	f__UA16	g__UA16	s__
LH3_1_75_bin.48	d__Bacteria;p__Bacteroidota;c__Bacteroidia;o__Flavobacteriales;f__UA16;g__UBA974;s__	N/A	N/A	N/A	N/A	N/A	GCA_002336655.1	95	d__Bacteria;p__Bacteroidota;c__Bacteroidia;o__Flavobacteriales;f__UA16;g__UBA974;s__UBA974 sp002336655	90.25	0.82	d__Bacteria;p__Bacteroidota;c__Bacteroidia;o__Flavobacteriales;f__UA16;g__UBA974;s__	taxonomic classification defined by topology and ANI	N/A	GCA_002700285.1, s__UBA974 sp002700285, 95.0, 88.81, 0.92	64.34	11	0.994122	Genome not assigned to closest species as it falls outside its pre-defined ANI radius	d__Bacteria	p__Bacteroidota	c__Bacteroidia	o__Flavobacteriales	f__UA16	g__UBA974	s__
LMG2001_200120_22_bin.45	d__Bacteria;p__Bacteroidota;c__Bacteroidia;o__Flavobacteriales;f__UA16;g__UBA974;s__	N/A	N/A	N/A	N/A	N/A	GCA_002292405.1	95	d__Bacteria;p__Bacteroidota;c__Bacteroidia;o__Flavobacteriales;f__UA16;g__UBA974;s__UBA974 sp002292405	93.1	0.66	d__Bacteria;p__Bacteroidota;c__Bacteroidia;o__Flavobacteriales;f__UA16;g__UBA974;s__	taxonomic classification defined by topology and ANI	N/A	GCA_002339135.1, s__UBA974 sp002339135, 95.0, 80.01, 0.73; GCA_012963975.1, s__UBA974 sp012963975, 95.0, 77.76, 0.25; GCA_002746975.1, s__UBA974 sp002746975, 95.0, 77.61, 0.24; GCA_002700285.1, s__UBA974 sp002700285, 95.0, 77.5, 0.22; GCA_002336655.1, s__UBA974 sp002336655, 95.0, 77.4, 0.21	75.48	11	0.991862	Genome not assigned to closest species as it falls outside its pre-defined ANI radius	d__Bacteria	p__Bacteroidota	c__Bacteroidia	o__Flavobacteriales	f__UA16	g__UBA974	s__
LMG2001_200120_22_bin.14	d__Bacteria;p__Chloroflexota;c__Dehalococcoidia;o__SAR202;f__UBA826;g__UBA11996;s__UBA11996 sp009392675	GCA_009392675.1	95	d__Bacteria;p__Chloroflexota;c__Dehalococcoidia;o__SAR202;f__UBA826;g__UBA11996;s__UBA11996 sp009392675	97.99	0.67	GCA_009392675.1	95	d__Bacteria;p__Chloroflexota;c__Dehalococcoidia;o__SAR202;f__UBA826;g__UBA11996;s__UBA11996 sp009392675	97.99	0.67	d__Bacteria;p__Chloroflexota;c__Dehalococcoidia;o__SAR202;f__UBA826;g__UBA11996;s__	taxonomic classification defined by topology and ANI	topological placement and ANI have congruent species assignments	GCA_002708495.1, s__UBA11996 sp002708495, 95.0, 95.89, 0.59; GCA_002435305.1, s__UBA11996 sp002435305, 95.0, 89.65, 0.83; GCA_002500485.1, s__UBA11996 sp002500485, 95.0, 89.11, 0.86; GCA_003228105.1, s__UBA11996 sp003228105, 95.0, 89.04, 0.73; GCA_012965485.1, s__UBA11996 sp012965485, 95.0, 88.73, 0.62; GCA_008373095.1, s__UBA11996 sp002320875, 95.0, 78.21, 0.33; GCA_002728195.1, s__UBA11996 sp00…	69.66	11	N/A	N/A	d__Bacteria	p__Chloroflexota	c__Dehalococcoidia	o__SAR202	f__UBA826	g__UBA11996	s__UBA11996 sp009392675
LMG2001_200115_16_bin.103	d__Bacteria;p__Chloroflexota;c__Dehalococcoidia;o__SAR202;f__VXLM01;g__;s__	N/A	N/A	N/A	N/A	N/A	N/A	N/A	N/A	N/A	N/A	d__Bacteria;p__Chloroflexota;c__Dehalococcoidia;o__SAR202;f__;g__;s__	taxonomic novelty determined using RED	N/A	N/A	62.06	11	0.780098	N/A	d__Bacteria	p__Chloroflexota	c__Dehalococcoidia	o__SAR202	f__VXLM01	g__	s__
LH5_2_200_bin.37	d__Bacteria;p__Chloroflexota;c__Dehalococcoidia;o__UBA1151;f__Bin127;g__UBA1328;s__	N/A	N/A	N/A	N/A	N/A	GCA_013204545.1	95	d__Bacteria;p__Chloroflexota;c__Dehalococcoidia;o__UBA1151;f__Bin127;g__UBA1328;s__UBA1328 sp013204545	77.83	0.32	d__Bacteria;p__Chloroflexota;c__Dehalococcoidia;o__UBA1151;f__Bin127;g__UBA1328;s__	taxonomic classification defined by topology and ANI	N/A	GCA_012959765.1, s__UBA1328 sp012959765, 95.0, 78.22, 0.41; GCA_002501045.1, s__UBA1328 sp002501045, 95.0, 77.79, 0.28; GCA_002306815.1, s__UBA1328 sp002306815, 95.0, 76.84, 0.21	87.63	11	0.955569	N/A	d__Bacteria	p__Chloroflexota	c__Dehalococcoidia	o__UBA1151	f__Bin127	g__UBA1328	s__
LMG2001_200120_22_bin.75	d__Bacteria;p__Chloroflexota;c__Dehalococcoidia;o__UBA1151;f__Bin127;g__UBA1328;s__	N/A	N/A	N/A	N/A	N/A	GCA_013204545.1	95	d__Bacteria;p__Chloroflexota;c__Dehalococcoidia;o__UBA1151;f__Bin127;g__UBA1328;s__UBA1328 sp013204545	78.02	0.39	d__Bacteria;p__Chloroflexota;c__Dehalococcoidia;o__UBA1151;f__Bin127;g__UBA1328;s__	taxonomic classification defined by topology and ANI	N/A	GCA_012959765.1, s__UBA1328 sp012959765, 95.0, 78.78, 0.43; GCA_002501045.1, s__UBA1328 sp002501045, 95.0, 78.13, 0.33; GCA_002306815.1, s__UBA1328 sp002306815, 95.0, 77.17, 0.23	84.69	11	0.957484	N/A	d__Bacteria	p__Chloroflexota	c__Dehalococcoidia	o__UBA1151	f__Bin127	g__UBA1328	s__
LH3_2_200_bin.116	d__Bacteria;p__Chloroflexota;c__Dehalococcoidia;o__UBA1151;f__UBA1151;g__GCA-2730555;s__	N/A	N/A	N/A	N/A	N/A	GCA_014239685.1	95	d__Bacteria;p__Chloroflexota;c__Dehalococcoidia;o__UBA1151;f__UBA1151;g__GCA-2730555;s__GCA-2730555 sp014239685	92.38	0.91	d__Bacteria;p__Chloroflexota;c__Dehalococcoidia;o__UBA1151;f__UBA1151;g__GCA-2730555;s__	taxonomic classification defined by topology and ANI	N/A	GCA_002730555.1, s__GCA-2730555 sp002730555, 95.0, 79.2, 0.54	90.15	11	0.987469	Genome not assigned to closest species as it falls outside its pre-defined ANI radius	d__Bacteria	p__Chloroflexota	c__Dehalococcoidia	o__UBA1151	f__UBA1151	g__GCA-2730555	s__
LMG2001_200115_16_bin.45	d__Bacteria;p__Chloroflexota;c__Dehalococcoidia;o__UBA3495;f__UBA3495;g__UBA9611;s__	N/A	N/A	N/A	N/A	N/A	GCA_012959605.1	95	d__Bacteria;p__Chloroflexota;c__Dehalococcoidia;o__UBA3495;f__UBA3495;g__UBA9611;s__UBA9611 sp012959605	86.66	0.8	d__Bacteria;p__Chloroflexota;c__Dehalococcoidia;o__UBA3495;f__UBA3495;g__UBA9611;s__	taxonomic classification defined by topology and ANI	N/A	GCA_002730485.1, s__UBA9611 sp002730485, 95.0, 79.46, 0.47; GCA_002328185.1, s__UBA9611 sp002328185, 95.0, 78.11, 0.45; GCA_002746355.1, s__UBA9611 sp002746355, 95.0, 77.97, 0.45; GCA_002816355.1, s__UBA9611 sp002816355, 95.0, 77.93, 0.34; GCA_009392075.1, s__UBA9611 sp009392075, 95.0, 77.84, 0.34; GCA_002816575.1, s__UBA9611 sp002816575, 95.0, 77.81, 0.32; GCA_002698265.1, s__UBA9611 sp002698265…	65.57	11	0.992349	Genome not assigned to closest species as it falls outside its pre-defined ANI radius	d__Bacteria	p__Chloroflexota	c__Dehalococcoidia	o__UBA3495	f__UBA3495	g__UBA9611	s__
LMG2001_200120_22_bin.60	d__Bacteria;p__Chloroflexota;c__Dehalococcoidia;o__UBA3495;f__UBA3495;g__UBA9611;s__UBA9611 sp012959605	GCA_012959605.1	95	d__Bacteria;p__Chloroflexota;c__Dehalococcoidia;o__UBA3495;f__UBA3495;g__UBA9611;s__UBA9611 sp012959605	96.64	0.88	GCA_012959605.1	95	d__Bacteria;p__Chloroflexota;c__Dehalococcoidia;o__UBA3495;f__UBA3495;g__UBA9611;s__UBA9611 sp012959605	96.64	0.88	d__Bacteria;p__Chloroflexota;c__Dehalococcoidia;o__UBA3495;f__UBA3495;g__UBA9611;s__	taxonomic classification defined by topology and ANI	topological placement and ANI have congruent species assignments	GCA_002730485.1, s__UBA9611 sp002730485, 95.0, 79.8, 0.49; GCA_002328185.1, s__UBA9611 sp002328185, 95.0, 78.54, 0.5; GCA_002746355.1, s__UBA9611 sp002746355, 95.0, 78.53, 0.5; GCA_009392075.1, s__UBA9611 sp009392075, 95.0, 78.41, 0.46; GCA_009391975.1, s__UBA9611 sp009391975, 95.0, 78.15, 0.47; GCA_002816355.1, s__UBA9611 sp002816355, 95.0, 77.91, 0.45; GCA_002816575.1, s__UBA9611 sp002816575, 9…	88.17	11	N/A	N/A	d__Bacteria	p__Chloroflexota	c__Dehalococcoidia	o__UBA3495	f__UBA3495	g__UBA9611	s__UBA9611 sp012959605
LMG2001_200115_16_bin.83	d__Bacteria;p__Gemmatimonadota;c__Gemmatimonadetes;o__Longimicrobiales;f__UBA6960;g__GCA-2718595;s__	N/A	N/A	N/A	N/A	N/A	GCA_012959595.1	95	d__Bacteria;p__Gemmatimonadota;c__Gemmatimonadetes;o__Longimicrobiales;f__UBA6960;g__GCA-2718595;s__GCA-2718595 sp012959595	83.11	0.74	d__Bacteria;p__Gemmatimonadota;c__Gemmatimonadetes;o__Longimicrobiales;f__UBA6960;g__GCA-2718595;s__	taxonomic classification defined by topology and ANI	N/A	GCA_002718595.1, s__GCA-2718595 sp002718595, 95.0, 78.16, 0.24	89.44	11	0.976643	Genome not assigned to closest species as it falls outside its pre-defined ANI radius	d__Bacteria	p__Gemmatimonadota	c__Gemmatimonadetes	o__Longimicrobiales	f__UBA6960	g__GCA-2718595	s__
LMG2001_200120_22_bin.26	d__Bacteria;p__Gemmatimonadota;c__Gemmatimonadetes;o__Longimicrobiales;f__UBA6960;g__UBA1138;s__UBA1138 sp002313925	GCA_002313925.1	95	d__Bacteria;p__Gemmatimonadota;c__Gemmatimonadetes;o__Longimicrobiales;f__UBA6960;g__UBA1138;s__UBA1138 sp002313925	97.69	0.79	GCA_002313925.1	95	d__Bacteria;p__Gemmatimonadota;c__Gemmatimonadetes;o__Longimicrobiales;f__UBA6960;g__UBA1138;s__UBA1138 sp002313925	97.69	0.79	d__Bacteria;p__Gemmatimonadota;c__Gemmatimonadetes;o__Longimicrobiales;f__UBA6960;g__UBA1138;s__	taxonomic classification defined by topology and ANI	topological placement and ANI have congruent species assignments	GCA_012960225.1, s__UBA1138 sp012960225, 95.0, 95.36, 0.87; GCA_002501085.1, s__UBA1138 sp002501085, 95.0, 94.42, 0.82; GCA_002724575.1, s__UBA1138 sp002724575, 95.0, 87.46, 0.75; GCA_002311875.1, s__UBA1138 sp002311875, 95.0, 82.35, 0.79	65.61	11	N/A	N/A	d__Bacteria	p__Gemmatimonadota	c__Gemmatimonadetes	o__Longimicrobiales	f__UBA6960	g__UBA1138	s__UBA1138 sp002313925
LH3_2_200_bin.94	d__Bacteria;p__Gemmatimonadota;c__Gemmatimonadetes;o__Longimicrobiales;f__UBA6960;g__UBA2589;s__	N/A	N/A	N/A	N/A	N/A	N/A	N/A	N/A	N/A	N/A	d__Bacteria;p__Gemmatimonadota;c__Gemmatimonadetes;o__Longimicrobiales;f__UBA6960;g__UBA2589;s__	taxonomic classification fully defined by topology	N/A	N/A	91.54	11	0.915588	N/A	d__Bacteria	p__Gemmatimonadota	c__Gemmatimonadetes	o__Longimicrobiales	f__UBA6960	g__UBA2589	s__
LH1_1_150_bin.38	d__Bacteria;p__Latescibacterota;c__UBA2968;o__UBA8231;f__UBA8231;g__GCA-2724215;s__	N/A	N/A	N/A	N/A	N/A	GCA_002724215.1	95	d__Bacteria;p__Latescibacterota;c__UBA2968;o__UBA8231;f__UBA8231;g__GCA-2724215;s__GCA-2724215 sp002724215	77.96	0.43	d__Bacteria;p__Latescibacterota;c__UBA2968;o__UBA8231;f__UBA8231;g__GCA-2724215;s__	taxonomic classification defined by topology and ANI	N/A	GCA_009841115.1, s__GCA-2724215 sp009841115, 95.0, 77.01, 0.2; GCA_009840005.1, s__GCA-2724215 sp009840005, 95.0, 76.89, 0.21	76.73	11	0.92845	N/A	d__Bacteria	p__Latescibacterota	c__UBA2968	o__UBA8231	f__UBA8231	g__GCA-2724215	s__
LMG2001_200120_22_bin.74	d__Bacteria;p__Marinisomatota;c__Marinisomatia;o__Marinisomatales;f__TCS55;g__TCS55;s__TCS55 sp002715035	GCA_002715035.1	95	d__Bacteria;p__Marinisomatota;c__Marinisomatia;o__Marinisomatales;f__TCS55;g__TCS55;s__TCS55 sp002715035	98.52	0.81	GCA_002715035.1	95	d__Bacteria;p__Marinisomatota;c__Marinisomatia;o__Marinisomatales;f__TCS55;g__TCS55;s__TCS55 sp002715035	98.52	0.81	d__Bacteria;p__Marinisomatota;c__Marinisomatia;o__Marinisomatales;f__TCS55;g__TCS55;s__	taxonomic classification defined by topology and ANI	topological placement and ANI have congruent species assignments	GCA_014382015.1, s__TCS55 sp014382015, 95.0, 83.72, 0.79; GCA_002471845.1, s__TCS55 sp002471845, 95.0, 77.77, 0.34; GCA_002716525.1, s__TCS55 sp002716525, 95.0, 77.6, 0.25; GCA_012964665.1, s__TCS55 sp012964665, 95.0, 77.34, 0.24; GCA_001577025.1, s__TCS55 sp001577025, 95.0, 77.08, 0.21	89.58	11	N/A	N/A	d__Bacteria	p__Marinisomatota	c__Marinisomatia	o__Marinisomatales	f__TCS55	g__TCS55	s__TCS55 sp002715035
LH5_1_75_bin.57	d__Bacteria;p__Myxococcota;c__UBA727;o__UBA4151;f__UBA4151;g__CACGMS01;s__	N/A	N/A	N/A	N/A	N/A	N/A	N/A	N/A	N/A	N/A	d__Bacteria;p__Myxococcota;c__UBA727;o__UBA4151;f__UBA4151;g__;s__	taxonomic novelty determined using RED	N/A	N/A	72.19	11	0.941811	N/A	d__Bacteria	p__Myxococcota	c__UBA727	o__UBA4151	f__UBA4151	g__CACGMS01	s__
LH5_1_200_bin.16	d__Bacteria;p__Myxococcota;c__UBA9160;o__UBA9160;f__UBA4427;g__;s__	N/A	N/A	N/A	N/A	N/A	N/A	N/A	N/A	N/A	N/A	d__Bacteria;p__Myxococcota;c__UBA9160;o__UBA9160;f__UBA4427;g__;s__	taxonomic novelty determined using RED	N/A	N/A	93.03	11	0.894882	N/A	d__Bacteria	p__Myxococcota	c__UBA9160	o__UBA9160	f__UBA4427	g__	s__
LH3_2_200_bin.74	d__Bacteria;p__Myxococcota;c__UBA9160;o__UBA9160;f__UBA4427;g__DUBZ01;s__DUBZ01 sp012960035	GCA_012960035.1	95	d__Bacteria;p__Myxococcota;c__UBA9160;o__UBA9160;f__UBA4427;g__DUBZ01;s__DUBZ01 sp012960035	96.65	0.95	GCA_012960035.1	95	d__Bacteria;p__Myxococcota;c__UBA9160;o__UBA9160;f__UBA4427;g__DUBZ01;s__DUBZ01 sp012960035	96.65	0.95	d__Bacteria;p__Myxococcota;c__UBA9160;o__UBA9160;f__UBA4427;g__;s__	taxonomic classification defined by topology and ANI	topological placement and ANI have congruent species assignments	N/A	86.98	11	N/A	N/A	d__Bacteria	p__Myxococcota	c__UBA9160	o__UBA9160	f__UBA4427	g__DUBZ01	s__DUBZ01 sp012960035
LH1_1_200_bin.1	d__Bacteria;p__Nitrospinota;c__Nitrospinia;o__Nitrospinales;f__Nitrospinaceae;g__LS-NOB;s__	N/A	N/A	N/A	N/A	N/A	GCA_002705185.1	95	d__Bacteria;p__Nitrospinota;c__Nitrospinia;o__Nitrospinales;f__Nitrospinaceae;g__LS-NOB;s__LS-NOB sp002705185	79.54	0.48	d__Bacteria;p__Nitrospinota;c__Nitrospinia;o__Nitrospinales;f__Nitrospinaceae;g__LS-NOB;s__	taxonomic classification defined by topology and ANI	N/A	GCA_014382285.1, s__LS-NOB sp014382285, 95.0, 83.78, 0.76; GCA_001542995.1, s__LS-NOB sp001542995, 95.0, 81.37, 0.74; GCA_002786505.1, s__LS-NOB sp002786505, 95.0, 80.23, 0.59; GCA_003545625.1, s__LS-NOB sp003545625, 95.0, 79.16, 0.5; GCA_009873635.1, s__LS-NOB sp009873635, 95.0, 78.46, 0.52; GCA_012961055.1, s__LS-NOB sp012961055, 95.0, 77.22, 0.33; GCA_002454045.1, s__LS-NOB sp002454045, 95.0, …	70.54	11	0.96659	Genome not assigned to closest species as it falls outside its pre-defined ANI radius	d__Bacteria	p__Nitrospinota	c__Nitrospinia	o__Nitrospinales	f__Nitrospinaceae	g__LS-NOB	s__
LMG2001_200112_7_bin.13	d__Bacteria;p__Nitrospinota;c__Nitrospinia;o__Nitrospinales;f__Nitrospinaceae;g__LS-NOB;s__LS-NOB sp003545625	GCA_003545625.1	95	d__Bacteria;p__Nitrospinota;c__Nitrospinia;o__Nitrospinales;f__Nitrospinaceae;g__LS-NOB;s__LS-NOB sp003545625	98.72	0.72	GCA_003545625.1	95	d__Bacteria;p__Nitrospinota;c__Nitrospinia;o__Nitrospinales;f__Nitrospinaceae;g__LS-NOB;s__LS-NOB sp003545625	98.72	0.72	d__Bacteria;p__Nitrospinota;c__Nitrospinia;o__Nitrospinales;f__Nitrospinaceae;g__LS-NOB;s__	taxonomic classification defined by topology and ANI	topological placement and ANI have congruent species assignments	GCA_001542995.1, s__LS-NOB sp001542995, 95.0, 82.47, 0.82; GCA_014382285.1, s__LS-NOB sp014382285, 95.0, 80.62, 0.79; GCA_002786505.1, s__LS-NOB sp002786505, 95.0, 79.94, 0.58; GCA_002454045.1, s__LS-NOB sp002454045, 95.0, 79.57, 0.57; GCA_012961055.1, s__LS-NOB sp012961055, 95.0, 79.13, 0.53; GCA_009873635.1, s__LS-NOB sp009873635, 95.0, 77.79, 0.46; GCA_002705185.1, s__LS-NOB sp002705185, 95.0,…	87.77	11	N/A	N/A	d__Bacteria	p__Nitrospinota	c__Nitrospinia	o__Nitrospinales	f__Nitrospinaceae	g__LS-NOB	s__LS-NOB sp003545625
LH1_1_200_bin.131	d__Bacteria;p__Planctomycetota;c__Phycisphaerae;o__Phycisphaerales;f__SM1A02;g__GCA-002718515;s__	N/A	N/A	N/A	N/A	N/A	N/A	N/A	N/A	N/A	N/A	d__Bacteria;p__Planctomycetota;c__Phycisphaerae;o__Phycisphaerales;f__SM1A02;g__GCA-002718515;s__	taxonomic classification fully defined by topology	N/A	N/A	72.9	11	0.959445	N/A	d__Bacteria	p__Planctomycetota	c__Phycisphaerae	o__Phycisphaerales	f__SM1A02	g__GCA-002718515	s__
LH5_1_75_bin.14	d__Bacteria;p__Planctomycetota;c__Phycisphaerae;o__Phycisphaerales;f__SM1A02;g__UBA12014;s__	N/A	N/A	N/A	N/A	N/A	N/A	N/A	N/A	N/A	N/A	d__Bacteria;p__Planctomycetota;c__Phycisphaerae;o__Phycisphaerales;f__SM1A02;g__UBA12014;s__	taxonomic classification defined by topology and ANI	N/A	GCA_014237965.1, s__UBA12014 sp014237965, 95.0, 82.59, 0.78; GCA_002167845.2, s__UBA12014 sp002167845, 95.0, 81.84, 0.73; GCA_002690755.1, s__UBA12014 sp002690755, 95.0, 78.65, 0.37; GCA_009936695.1, s__UBA12014 sp009936695, 95.0, 78.45, 0.44; GCA_002684755.1, s__UBA12014 sp002684755, 95.0, 78.42, 0.39; GCA_002684855.1, s__UBA12014 sp002684855, 95.0, 77.86, 0.31; GCA_002683215.1, s__UBA12014 sp00…	89.04	11	0.98389	Genome not assigned to closest species as it falls outside its pre-defined ANI radius	d__Bacteria	p__Planctomycetota	c__Phycisphaerae	o__Phycisphaerales	f__SM1A02	g__UBA12014	s__
LMG2001_200120_22_bin.2	d__Bacteria;p__Planctomycetota;c__Planctomycetes;o__Pirellulales;f__Pirellulaceae;g__;s__	N/A	N/A	N/A	N/A	N/A	N/A	N/A	N/A	N/A	N/A	d__Bacteria;p__Planctomycetota;c__Planctomycetes;o__Pirellulales;f__Pirellulaceae;g__;s__	taxonomic classification fully defined by topology	N/A	N/A	52.67	11	0.820977	N/A	d__Bacteria	p__Planctomycetota	c__Planctomycetes	o__Pirellulales	f__Pirellulaceae	g__	s__
LH3_1_75_bin.93	d__Bacteria;p__Planctomycetota;c__Planctomycetes;o__Pirellulales;f__Pirellulaceae;g__Mariniblastus;s__	N/A	N/A	N/A	N/A	N/A	N/A	N/A	N/A	N/A	N/A	d__Bacteria;p__Planctomycetota;c__Planctomycetes;o__Pirellulales;f__Pirellulaceae;g__Mariniblastus;s__	ANI	N/A	GCA_011087765.1, s__Mariniblastus sp011087765, 95.0, 80.16, 0.63; GCA_011523945.1, s__Mariniblastus sp011523945, 95.0, 79.19, 0.5	84.51	11	0.983278	N/A	d__Bacteria	p__Planctomycetota	c__Planctomycetes	o__Pirellulales	f__Pirellulaceae	g__Mariniblastus	s__
LH5_2_200_bin.5	d__Bacteria;p__Planctomycetota;c__Planctomycetes;o__Pirellulales;f__Pirellulaceae;g__Rubripirellula;s__	N/A	N/A	N/A	N/A	N/A	N/A	N/A	N/A	N/A	N/A	d__Bacteria;p__Planctomycetota;c__Planctomycetes;o__Pirellulales;f__Pirellulaceae;g__Rubripirellula;s__	ANI	N/A	GCA_002862205.1, s__Rubripirellula sp002862205, 95.0, 77.89, 0.22; GCA_002712845.1, s__Rubripirellula sp002712845, 95.0, 77.71, 0.26	84.14	11	0.972516	N/A	d__Bacteria	p__Planctomycetota	c__Planctomycetes	o__Pirellulales	f__Pirellulaceae	g__Rubripirellula	s__
LMG2001_200115_16_bin.95	d__Bacteria;p__Planctomycetota;c__Planctomycetes;o__Pirellulales;f__Pirellulaceae;g__UBA721;s__	N/A	N/A	N/A	N/A	N/A	GCA_012965455.1	95	d__Bacteria;p__Planctomycetota;c__Planctomycetes;o__Pirellulales;f__Pirellulaceae;g__UBA721;s__UBA721 sp012965455	87.19	0.69	d__Bacteria;p__Planctomycetota;c__Planctomycetes;o__Pirellulales;f__Pirellulaceae;g__UBA721;s__	taxonomic classification defined by topology and ANI	N/A	N/A	52.17	11	0.986871	Genome not assigned to closest species as it falls outside its pre-defined ANI radius	d__Bacteria	p__Planctomycetota	c__Planctomycetes	o__Pirellulales	f__Pirellulaceae	g__UBA721	s__
LH3_1_150_bin.126	d__Bacteria;p__Planctomycetota;c__Planctomycetes;o__Pirellulales;f__UBA7805;g__UBA7805;s__	N/A	N/A	N/A	N/A	N/A	GCA_002168195.1	95	d__Bacteria;p__Planctomycetota;c__Planctomycetes;o__Pirellulales;f__UBA7805;g__UBA7805;s__UBA7805 sp002168195	79.25	0.59	d__Bacteria;p__Planctomycetota;c__Planctomycetes;o__Pirellulales;f__UBA7805;g__UBA7805;s__	taxonomic classification defined by topology and ANI	N/A	GCA_002480485.1, s__UBA7805 sp002480485, 95.0, 76.78, 0.09	62.8	11	0.977229	N/A	d__Bacteria	p__Planctomycetota	c__Planctomycetes	o__Pirellulales	f__UBA7805	g__UBA7805	s__
LH5_1_150_bin.103	d__Bacteria;p__Planctomycetota;c__UBA1135;o__UBA1135;f__;g__;s__	N/A	N/A	N/A	N/A	N/A	N/A	N/A	N/A	N/A	N/A	d__Bacteria;p__Planctomycetota;c__UBA1135;o__UBA1135;f__;g__;s__	taxonomic novelty determined using RED	N/A	N/A	58.9	11	0.686485	N/A	d__Bacteria	p__Planctomycetota	c__UBA1135	o__UBA1135	f__	g__	s__
LH5_1_200_bin.112	d__Bacteria;p__Planctomycetota;c__UBA1135;o__UBA1135;f__GCA-002686595;g__;s__	N/A	N/A	N/A	N/A	N/A	N/A	N/A	N/A	N/A	N/A	d__Bacteria;p__Planctomycetota;c__UBA1135;o__UBA1135;f__GCA-002686595;g__;s__	taxonomic classification fully defined by topology	N/A	N/A	70.16	11	0.803395	N/A	d__Bacteria	p__Planctomycetota	c__UBA1135	o__UBA1135	f__GCA-002686595	g__	s__
LH3_2_200_bin.53	d__Bacteria;p__Planctomycetota;c__UBA1135;o__UBA1135;f__GCA-002686595;g__GCA-2686945;s__	N/A	N/A	N/A	N/A	N/A	N/A	N/A	N/A	N/A	N/A	d__Bacteria;p__Planctomycetota;c__UBA1135;o__UBA1135;f__GCA-002686595;g__GCA-2686945;s__	ANI	N/A	GCA_012960475.1, s__GCA-2686945 sp012960475, 95.0, 78.95, 0.46; GCA_014238415.1, s__GCA-2686945 sp014238415, 95.0, 78.46, 0.41; GCA_002686945.1, s__GCA-2686945 sp002686945, 95.0, 78.37, 0.4	88.33	11	0.972274	N/A	d__Bacteria	p__Planctomycetota	c__UBA1135	o__UBA1135	f__GCA-002686595	g__GCA-2686945	s__
LH3_2_200_bin.12	d__Bacteria;p__Planctomycetota;c__UBA1135;o__UBA1135;f__GCA-002686595;g__GCA-2720975;s__	N/A	N/A	N/A	N/A	N/A	GCA_012959525.1	95	d__Bacteria;p__Planctomycetota;c__UBA1135;o__UBA1135;f__GCA-002686595;g__GCA-2720975;s__GCA-2720975 sp012959525	83.9	0.82	d__Bacteria;p__Planctomycetota;c__UBA1135;o__UBA1135;f__GCA-002686595;g__GCA-2720975;s__	taxonomic classification defined by topology and ANI	N/A	GCA_002720975.1, s__GCA-2720975 sp002720975, 95.0, 83.47, 0.68	85.25	11	0.98686	Genome not assigned to closest species as it falls outside its pre-defined ANI radius	d__Bacteria	p__Planctomycetota	c__UBA1135	o__UBA1135	f__GCA-002686595	g__GCA-2720975	s__
LH3_2_200_bin.115	d__Bacteria;p__Planctomycetota;c__UBA1135;o__UBA1135;f__UBA1135;g__;s__	N/A	N/A	N/A	N/A	N/A	N/A	N/A	N/A	N/A	N/A	d__Bacteria;p__Planctomycetota;c__UBA1135;o__UBA1135;f__UBA1135;g__;s__	taxonomic classification fully defined by topology	N/A	N/A	87.93	11	0.85395	N/A	d__Bacteria	p__Planctomycetota	c__UBA1135	o__UBA1135	f__UBA1135	g__	s__
LH3_1_75_bin.47	d__Bacteria;p__Planctomycetota;c__UBA1135;o__UBA1135;f__UBA1135;g__GCA-2746235;s__	N/A	N/A	N/A	N/A	N/A	N/A	N/A	N/A	N/A	N/A	d__Bacteria;p__Planctomycetota;c__UBA1135;o__UBA1135;f__UBA1135;g__;s__	taxonomic novelty determined using RED	N/A	N/A	56.64	11	0.898214	N/A	d__Bacteria	p__Planctomycetota	c__UBA1135	o__UBA1135	f__UBA1135	g__GCA-2746235	s__
LMG2001_200120_22_bin.62	d__Bacteria;p__Planctomycetota;c__UBA1135;o__UBA1135;f__UBA1135;g__GCA-2746235;s__	N/A	N/A	N/A	N/A	N/A	N/A	N/A	N/A	N/A	N/A	d__Bacteria;p__Planctomycetota;c__UBA1135;o__UBA1135;f__UBA1135;g__;s__	taxonomic novelty determined using RED	N/A	N/A	79.51	11	0.904485	N/A	d__Bacteria	p__Planctomycetota	c__UBA1135	o__UBA1135	f__UBA1135	g__GCA-2746235	s__
LH1_1_150_bin.123	d__Bacteria;p__Planctomycetota;c__UBA8108;o__UBA1146;f__UBA1146;g__QNYK01;s__	N/A	N/A	N/A	N/A	N/A	N/A	N/A	N/A	N/A	N/A	d__Bacteria;p__Planctomycetota;c__UBA8108;o__UBA1146;f__UBA1146;g__QNYK01;s__	taxonomic classification defined by topology and ANI	N/A	GCA_014240375.1, s__QNYK01 sp014240375, 95.0, 83.46, 0.87; GCA_012960845.1, s__QNYK01 sp012960845, 95.0, 83.41, 0.79; GCA_003973385.1, s__QNYK01 sp003973385, 95.0, 78.51, 0.4	83.26	11	0.969655	Genome not assigned to closest species as it falls outside its pre-defined ANI radius	d__Bacteria	p__Planctomycetota	c__UBA8108	o__UBA1146	f__UBA1146	g__QNYK01	s__
LH1_1_200_bin.16	d__Bacteria;p__Planctomycetota;c__UBA8108;o__UBA1146;f__UBA1146;g__QNYK01;s__QNYK01 sp014240375	GCA_014240375.1	95	d__Bacteria;p__Planctomycetota;c__UBA8108;o__UBA1146;f__UBA1146;g__QNYK01;s__QNYK01 sp014240375	99.25	0.97	GCA_014240375.1	95	d__Bacteria;p__Planctomycetota;c__UBA8108;o__UBA1146;f__UBA1146;g__QNYK01;s__QNYK01 sp014240375	99.25	0.97	d__Bacteria;p__Planctomycetota;c__UBA8108;o__UBA1146;f__UBA1146;g__QNYK01;s__	taxonomic classification defined by topology and ANI	topological placement and ANI have congruent species assignments	GCA_012960845.1, s__QNYK01 sp012960845, 95.0, 94.49, 0.9; GCA_003973385.1, s__QNYK01 sp003973385, 95.0, 79.28, 0.44	76.32	11	N/A	N/A	d__Bacteria	p__Planctomycetota	c__UBA8108	o__UBA1146	f__UBA1146	g__QNYK01	s__QNYK01 sp014240375
LMG2001_200120_22_bin.31	d__Bacteria;p__Planctomycetota;c__UBA8108;o__UBA8108;f__UBA8108;g__UBA8108;s__UBA8108 sp003509045	GCA_003509045.1	95	d__Bacteria;p__Planctomycetota;c__UBA8108;o__UBA8108;f__UBA8108;g__UBA8108;s__UBA8108 sp003509045	98.49	0.93	GCA_003509045.1	95	d__Bacteria;p__Planctomycetota;c__UBA8108;o__UBA8108;f__UBA8108;g__UBA8108;s__UBA8108 sp003509045	98.49	0.93	d__Bacteria;p__Planctomycetota;c__UBA8108;o__UBA8108;f__UBA8108;g__UBA8108;s__	taxonomic classification defined by topology and ANI	topological placement and ANI have congruent species assignments	GCA_002708465.1, s__UBA8108 sp002708465, 95.0, 95.73, 0.87; GCA_002320775.1, s__UBA8108 sp002320775, 95.0, 90.94, 0.85; GCA_002695115.1, s__UBA8108 sp002695115, 95.0, 81.48, 0.69	83.26	11	N/A	N/A	d__Bacteria	p__Planctomycetota	c__UBA8108	o__UBA8108	f__UBA8108	g__UBA8108	s__UBA8108 sp003509045
LH3_1_150_bin.54	d__Bacteria;p__Proteobacteria;c__Alphaproteobacteria;o__GCA-2731375;f__GCA-2731375;g__GCA-2731375;s__	N/A	N/A	N/A	N/A	N/A	GCA_002731375.1	95	d__Bacteria;p__Proteobacteria;c__Alphaproteobacteria;o__GCA-2731375;f__GCA-2731375;g__GCA-2731375;s__GCA-2731375 sp002731375	77.41	0.34	d__Bacteria;p__Proteobacteria;c__Alphaproteobacteria;o__;f__;g__;s__	taxonomic classification defined by topology and ANI	N/A	N/A	87.97	11	0.928431	N/A	d__Bacteria	p__Proteobacteria	c__Alphaproteobacteria	o__GCA-2731375	f__GCA-2731375	g__GCA-2731375	s__
LMG2001_200120_22_bin.56	d__Bacteria;p__Proteobacteria;c__Alphaproteobacteria;o__GCA-2731375;f__GCA-2731375;g__GCA-2731375;s__	N/A	N/A	N/A	N/A	N/A	GCA_002731375.1	95	d__Bacteria;p__Proteobacteria;c__Alphaproteobacteria;o__GCA-2731375;f__GCA-2731375;g__GCA-2731375;s__GCA-2731375 sp002731375	78.46	0.47	d__Bacteria;p__Proteobacteria;c__Alphaproteobacteria;o__;f__;g__;s__	taxonomic classification defined by topology and ANI	N/A	N/A	89.91	11	0.912289	N/A	d__Bacteria	p__Proteobacteria	c__Alphaproteobacteria	o__GCA-2731375	f__GCA-2731375	g__GCA-2731375	s__
LMG2001_200120_10_bin.62	d__Bacteria;p__Proteobacteria;c__Alphaproteobacteria;o__MPNO01;f__MPNO01;g__GCA-2689465;s__	N/A	N/A	N/A	N/A	N/A	GCA_002689465.1	95	d__Bacteria;p__Proteobacteria;c__Alphaproteobacteria;o__MPNO01;f__MPNO01;g__GCA-2689465;s__GCA-2689465 sp002689465	78.93	0.45	d__Bacteria;p__Proteobacteria;c__Alphaproteobacteria;o__MPNO01;f__MPNO01;g__;s__	taxonomic classification defined by topology and ANI	N/A	N/A	92.59	11	0.945829	N/A	d__Bacteria	p__Proteobacteria	c__Alphaproteobacteria	o__MPNO01	f__MPNO01	g__GCA-2689465	s__
depth6_bin.50	d__Bacteria;p__Proteobacteria;c__Alphaproteobacteria;o__Rhizobiales;f__Beijerinckiaceae;g__RH-AL1;s__RH-AL1 sp901457705	GCF_901457705.2	95	d__Bacteria;p__Proteobacteria;c__Alphaproteobacteria;o__Rhizobiales;f__Beijerinckiaceae;g__RH-AL1;s__RH-AL1 sp901457705	99.95	0.98	GCF_901457705.2	95	d__Bacteria;p__Proteobacteria;c__Alphaproteobacteria;o__Rhizobiales;f__Beijerinckiaceae;g__RH-AL1;s__RH-AL1 sp901457705	99.95	0.98	d__Bacteria;p__Proteobacteria;c__Alphaproteobacteria;o__Rhizobiales;f__Beijerinckiaceae;g__RH-AL1;s__	taxonomic classification defined by topology and ANI	topological placement and ANI have congruent species assignments	GCF_009765775.1, s__RH-AL1 sp009765775, 95.0, 79.21, 0.45	92.1	11	N/A	N/A	d__Bacteria	p__Proteobacteria	c__Alphaproteobacteria	o__Rhizobiales	f__Beijerinckiaceae	g__RH-AL1	s__RH-AL1 sp901457705
LH3_2_200_bin.63	d__Bacteria;p__Proteobacteria;c__Alphaproteobacteria;o__Rhizobiales;f__Rhizobiaceae;g__Aurantimonas;s__Aurantimonas coralicida	GCF_000421645.1	95.4342	d__Bacteria;p__Proteobacteria;c__Alphaproteobacteria;o__Rhizobiales;f__Rhizobiaceae;g__Aurantimonas;s__Aurantimonas coralicida	96.68	0.94	GCF_000421645.1	95.4342	d__Bacteria;p__Proteobacteria;c__Alphaproteobacteria;o__Rhizobiales;f__Rhizobiaceae;g__Aurantimonas;s__Aurantimonas coralicida	96.68	0.94	d__Bacteria;p__Proteobacteria;c__Alphaproteobacteria;o__Rhizobiales;f__Rhizobiaceae;g__Aurantimonas;s__	taxonomic classification defined by topology and ANI	topological placement and ANI have congruent species assignments	GCF_000153465.1, s__Aurantimonas manganoxydans, 95.4342, 95.23, 0.88; GCF_010500835.1, s__Aurantimonas aggregata, 95.0, 82.48, 0.62; GCF_014196845.1, s__Aurantimonas endophytica, 95.0, 82.23, 0.63; GCA_011050685.1, s__Aurantimonas coralicida_A, 95.0, 81.28, 0.57	88.33	11	N/A	N/A	d__Bacteria	p__Proteobacteria	c__Alphaproteobacteria	o__Rhizobiales	f__Rhizobiaceae	g__Aurantimonas	s__Aurantimonas coralicida
LMG2001_200120_17_bin.12	d__Bacteria;p__Proteobacteria;c__Alphaproteobacteria;o__Rhodobacterales;f__Rhodobacteraceae;g__Amylibacter;s__	N/A	N/A	N/A	N/A	N/A	N/A	N/A	N/A	N/A	N/A	d__Bacteria;p__Proteobacteria;c__Alphaproteobacteria;o__Rhodobacterales;f__Rhodobacteraceae;g__Amylibacter;s__	ANI	N/A	GCF_000153745.1, s__Amylibacter sp000153745, 95.0, 78.08, 0.29; GCF_900197625.1, s__Amylibacter sp900197625, 95.0, 77.85, 0.27	89.93	11	0.971823	N/A	d__Bacteria	p__Proteobacteria	c__Alphaproteobacteria	o__Rhodobacterales	f__Rhodobacteraceae	g__Amylibacter	s__
170123_PAL_Sterivex_14_bin.3	d__Bacteria;p__Proteobacteria;c__Alphaproteobacteria;o__Rhodobacterales;f__Rhodobacteraceae;g__Ascidiaceihabitans;s__	N/A	N/A	N/A	N/A	N/A	GCA_002478745.1	95	d__Bacteria;p__Proteobacteria;c__Alphaproteobacteria;o__Rhodobacterales;f__Rhodobacteraceae;g__Ascidiaceihabitans;s__Ascidiaceihabitans sp002478745	91.9	0.81	d__Bacteria;p__Proteobacteria;c__Alphaproteobacteria;o__Rhodobacterales;f__Rhodobacteraceae;g__Ascidiaceihabitans;s__	taxonomic classification defined by topology and ANI	N/A	GCF_900302465.1, s__Ascidiaceihabitans donghaensis, 95.0, 77.37, 0.23	94.24	11	0.995828	Genome not assigned to closest species as it falls outside its pre-defined ANI radius	d__Bacteria	p__Proteobacteria	c__Alphaproteobacteria	o__Rhodobacterales	f__Rhodobacteraceae	g__Ascidiaceihabitans	s__
LH3_1_5_bin.23	d__Bacteria;p__Proteobacteria;c__Alphaproteobacteria;o__Rhodobacterales;f__Rhodobacteraceae;g__CPC320;s__CPC320 sp002336405	GCA_002336405.1	95	d__Bacteria;p__Proteobacteria;c__Alphaproteobacteria;o__Rhodobacterales;f__Rhodobacteraceae;g__CPC320;s__CPC320 sp002336405	99.37	0.8	GCA_002336405.1	95	d__Bacteria;p__Proteobacteria;c__Alphaproteobacteria;o__Rhodobacterales;f__Rhodobacteraceae;g__CPC320;s__CPC320 sp002336405	99.37	0.8	d__Bacteria;p__Proteobacteria;c__Alphaproteobacteria;o__Rhodobacterales;f__Rhodobacteraceae;g__CPC320;s__	taxonomic classification defined by topology and ANI	topological placement and ANI have congruent species assignments	GCA_002684375.1, s__CPC320 sp002684375, 95.0, 86.87, 0.74	83.92	11	N/A	N/A	d__Bacteria	p__Proteobacteria	c__Alphaproteobacteria	o__Rhodobacterales	f__Rhodobacteraceae	g__CPC320	s__CPC320 sp002336405
LH1_1_200_bin.136	d__Bacteria;p__Proteobacteria;c__Alphaproteobacteria;o__Rhodobacterales;f__Rhodobacteraceae;g__GCA-002712045;s__	N/A	N/A	N/A	N/A	N/A	GCA_002683355.1	95	d__Bacteria;p__Proteobacteria;c__Alphaproteobacteria;o__Rhodobacterales;f__Rhodobacteraceae;g__GCA-002712045;s__GCA-002712045 sp002683355	78.28	0.45	d__Bacteria;p__Proteobacteria;c__Alphaproteobacteria;o__Rhodobacterales;f__Rhodobacteraceae;g__GCA-002712045;s__	taxonomic classification defined by topology and ANI	N/A	GCA_002712045.1, s__GCA-002712045 sp002712045, 95.0, 76.52, 0.23	86.66	11	0.938162	N/A	d__Bacteria	p__Proteobacteria	c__Alphaproteobacteria	o__Rhodobacterales	f__Rhodobacteraceae	g__GCA-002712045	s__
LMG2001_200120_20_bin.36	d__Bacteria;p__Proteobacteria;c__Alphaproteobacteria;o__Rhodobacterales;f__Rhodobacteraceae;g__GCA-2697345;s__	N/A	N/A	N/A	N/A	N/A	GCA_002697345.1	95	d__Bacteria;p__Proteobacteria;c__Alphaproteobacteria;o__Rhodobacterales;f__Rhodobacteraceae;g__GCA-2697345;s__GCA-2697345 sp002697345	87.74	0.76	d__Bacteria;p__Proteobacteria;c__Alphaproteobacteria;o__Rhodobacterales;f__Rhodobacteraceae;g__;s__	taxonomic classification defined by topology and ANI	N/A	N/A	84.53	11	0.975662	Genome not assigned to closest species as it falls outside its pre-defined ANI radius	d__Bacteria	p__Proteobacteria	c__Alphaproteobacteria	o__Rhodobacterales	f__Rhodobacteraceae	g__GCA-2697345	s__
depth1_bin.10	d__Bacteria;p__Proteobacteria;c__Alphaproteobacteria;o__Rhodobacterales;f__Rhodobacteraceae;g__Octadecabacter;s__	N/A	N/A	N/A	N/A	N/A	GCF_000155735.2	95	d__Bacteria;p__Proteobacteria;c__Alphaproteobacteria;o__Rhodobacterales;f__Rhodobacteraceae;g__Octadecabacter;s__Octadecabacter arcticus	79.22	0.53	d__Bacteria;p__Proteobacteria;c__Alphaproteobacteria;o__Rhodobacterales;f__Rhodobacteraceae;g__Octadecabacter;s__	taxonomic classification defined by topology and ANI	N/A	GCF_000155675.2, s__Octadecabacter antarcticus, 95.0, 79.68, 0.58	91.76	11	0.993436	N/A	d__Bacteria	p__Proteobacteria	c__Alphaproteobacteria	o__Rhodobacterales	f__Rhodobacteraceae	g__Octadecabacter	s__
LMG2001_200120_17_bin.42	d__Bacteria;p__Proteobacteria;c__Alphaproteobacteria;o__Rhodobacterales;f__Rhodobacteraceae;g__Planktomarina;s__	N/A	N/A	N/A	N/A	N/A	N/A	N/A	N/A	N/A	N/A	d__Bacteria;p__Proteobacteria;c__Alphaproteobacteria;o__Rhodobacterales;f__Rhodobacteraceae;g__Planktomarina;s__	taxonomic classification fully defined by topology	N/A	N/A	68.91	11	0.957043	N/A	d__Bacteria	p__Proteobacteria	c__Alphaproteobacteria	o__Rhodobacterales	f__Rhodobacteraceae	g__Planktomarina	s__
LMG2001_200120_19_bin.25	d__Bacteria;p__Proteobacteria;c__Alphaproteobacteria;o__Rhodobacterales;f__Rhodobacteraceae;g__Planktomarina;s__	N/A	N/A	N/A	N/A	N/A	GCA_002698165.1	95	d__Bacteria;p__Proteobacteria;c__Alphaproteobacteria;o__Rhodobacterales;f__Rhodobacteraceae;g__Planktomarina;s__Planktomarina sp002698165	77.19	0.25	d__Bacteria;p__Proteobacteria;c__Alphaproteobacteria;o__Rhodobacterales;f__Rhodobacteraceae;g__Planktomarina;s__	taxonomic classification defined by topology and ANI	N/A	N/A	78.76	11	0.971458	N/A	d__Bacteria	p__Proteobacteria	c__Alphaproteobacteria	o__Rhodobacterales	f__Rhodobacteraceae	g__Planktomarina	s__
LMG2001_200120_19_bin.21	d__Bacteria;p__Proteobacteria;c__Alphaproteobacteria;o__Rhodobacterales;f__Rhodobacteraceae;g__Planktomarina;s__Planktomarina sp000981705	GCA_000981705.1	95	d__Bacteria;p__Proteobacteria;c__Alphaproteobacteria;o__Rhodobacterales;f__Rhodobacteraceae;g__Planktomarina;s__Planktomarina sp000981705	99.62	0.92	GCA_000981705.1	95	d__Bacteria;p__Proteobacteria;c__Alphaproteobacteria;o__Rhodobacterales;f__Rhodobacteraceae;g__Planktomarina;s__Planktomarina sp000981705	99.62	0.92	d__Bacteria;p__Proteobacteria;c__Alphaproteobacteria;o__Rhodobacterales;f__Rhodobacteraceae;g__Planktomarina;s__	taxonomic classification defined by topology and ANI	topological placement and ANI have congruent species assignments	GCF_000738435.1, s__Planktomarina temperata, 95.0, 77.43, 0.23	95.41	11	N/A	N/A	d__Bacteria	p__Proteobacteria	c__Alphaproteobacteria	o__Rhodobacterales	f__Rhodobacteraceae	g__Planktomarina	s__Planktomarina sp000981705
LMG1901_190131_1_bin.12	d__Bacteria;p__Proteobacteria;c__Alphaproteobacteria;o__Rhodobacterales;f__Rhodobacteraceae;g__Sulfitobacter;s__	N/A	N/A	N/A	N/A	N/A	N/A	N/A	N/A	N/A	N/A	d__Bacteria;p__Proteobacteria;c__Alphaproteobacteria;o__Rhodobacterales;f__Rhodobacteraceae;g__Sulfitobacter;s__	taxonomic classification defined by topology and ANI	N/A	GCF_013282155.1, s__Sulfitobacter sp013282155, 95.0, 84.75, 0.75; GCA_013139555.1, s__Sulfitobacter sp013139555, 95.0, 83.17, 0.62; GCF_900116285.1, s__Sulfitobacter marinus, 95.0, 81.9, 0.65; GCF_000156335.1, s__Sulfitobacter sp000156335, 95.0, 80.85, 0.57; GCA_011050655.1, s__Sulfitobacter sp011050655, 95.0, 80.54, 0.32; GCF_006064855.1, s__Sulfitobacter sp006064855, 95.0, 79.81, 0.44; GCF_9001…	72.96	11	0.990649	Genome not assigned to closest species as it falls outside its pre-defined ANI radius	d__Bacteria	p__Proteobacteria	c__Alphaproteobacteria	o__Rhodobacterales	f__Rhodobacteraceae	g__Sulfitobacter	s__
LH1_2_5_bin.3	d__Bacteria;p__Proteobacteria;c__Alphaproteobacteria;o__Rhodobacterales;f__Rhodobacteraceae;g__Yoonia;s__	N/A	N/A	N/A	N/A	N/A	GCA_002378665.1	95	d__Bacteria;p__Proteobacteria;c__Alphaproteobacteria;o__Rhodobacterales;f__Rhodobacteraceae;g__Yoonia;s__Yoonia sp002378665	78.26	0.38	d__Bacteria;p__Proteobacteria;c__Alphaproteobacteria;o__Rhodobacterales;f__Rhodobacteraceae;g__Yoonia;s__	taxonomic classification defined by topology and ANI	N/A	GCF_900115105.1, s__Yoonia tamlensis, 95.0, 77.71, 0.25; GCF_003003285.1, s__Yoonia maritima, 95.0, 77.59, 0.23; GCF_014199395.1, s__Yoonia ponticola, 95.0, 77.49, 0.26; GCF_000169435.1, s__Yoonia sp000169435, 95.0, 77.42, 0.24; GCF_002933395.1, s__Yoonia maritima_A, 95.0, 77.32, 0.21; GCF_003318235.1, s__Yoonia sp003318235, 95.0, 77.27, 0.23; GCF_900143545.1, s__Yoonia sp900143545, 95.0, 77.06, …	94.06	11	0.972306	N/A	d__Bacteria	p__Proteobacteria	c__Alphaproteobacteria	o__Rhodobacterales	f__Rhodobacteraceae	g__Yoonia	s__
LMG1901_190113_2_bin.12	d__Bacteria;p__Proteobacteria;c__Alphaproteobacteria;o__Rhodobacterales;f__Rhodobacteraceae;g__Yoonia;s__	N/A	N/A	N/A	N/A	N/A	GCF_014199395.1	95	d__Bacteria;p__Proteobacteria;c__Alphaproteobacteria;o__Rhodobacterales;f__Rhodobacteraceae;g__Yoonia;s__Yoonia ponticola	78.98	0.44	d__Bacteria;p__Proteobacteria;c__Alphaproteobacteria;o__Rhodobacterales;f__Rhodobacteraceae;g__Yoonia;s__	taxonomic classification defined by topology and ANI	N/A	N/A	79.73	11	0.983721	N/A	d__Bacteria	p__Proteobacteria	c__Alphaproteobacteria	o__Rhodobacterales	f__Rhodobacteraceae	g__Yoonia	s__
LH1_2_35_bin.41	d__Bacteria;p__Proteobacteria;c__Alphaproteobacteria;o__Rhodospirillales;f__Casp-alpha2;g__JABMNT01;s__	N/A	N/A	N/A	N/A	N/A	N/A	N/A	N/A	N/A	N/A	d__Bacteria;p__Proteobacteria;c__Alphaproteobacteria;o__Rhodospirillales;f__Casp-alpha2;g__;s__	taxonomic novelty determined using RED	N/A	N/A	94.26	11	0.93432	N/A	d__Bacteria	p__Proteobacteria	c__Alphaproteobacteria	o__Rhodospirillales	f__Casp-alpha2	g__JABMNT01	s__
LMG2001_200120_10_bin.57	d__Bacteria;p__Proteobacteria;c__Alphaproteobacteria;o__Rhodospirillales;f__Rhodospirillaceae;g__WLXB01;s__	N/A	N/A	N/A	N/A	N/A	GCA_012103295.1	95	d__Bacteria;p__Proteobacteria;c__Alphaproteobacteria;o__Rhodospirillales;f__Rhodospirillaceae;g__WLXB01;s__WLXB01 sp012103295	77.61	0.23	d__Bacteria;p__Proteobacteria;c__Alphaproteobacteria;o__Rhodospirillales;f__Rhodospirillaceae;g__;s__	taxonomic classification defined by topology and ANI	N/A	N/A	94.5	11	0.9491	N/A	d__Bacteria	p__Proteobacteria	c__Alphaproteobacteria	o__Rhodospirillales	f__Rhodospirillaceae	g__WLXB01	s__
LMG2001_200120_10_bin.1	d__Bacteria;p__Proteobacteria;c__Alphaproteobacteria;o__SHVP01;f__SHVP01;g__;s__	N/A	N/A	N/A	N/A	N/A	N/A	N/A	N/A	N/A	N/A	d__Bacteria;p__Proteobacteria;c__Alphaproteobacteria;o__;f__;g__;s__	taxonomic novelty determined using RED	N/A	N/A	64.07	11	0.811966	N/A	d__Bacteria	p__Proteobacteria	c__Alphaproteobacteria	o__SHVP01	f__SHVP01	g__	s__
LH3_2_200_bin.7	d__Bacteria;p__Proteobacteria;c__Alphaproteobacteria;o__Sphingomonadales;f__Sphingomonadaceae;g__Erythrobacter_A;s__	N/A	N/A	N/A	N/A	N/A	GCF_009828015.1	95	d__Bacteria;p__Proteobacteria;c__Alphaproteobacteria;o__Sphingomonadales;f__Sphingomonadaceae;g__Erythrobacter_A;s__Erythrobacter_A citreus	87.37	0.74	d__Bacteria;p__Proteobacteria;c__Alphaproteobacteria;o__Sphingomonadales;f__Sphingomonadaceae;g__Erythrobacter_A;s__	taxonomic classification defined by topology and ANI	N/A	GCF_011762005.1, s__Erythrobacter_A flavus, 95.0, 84.89, 0.8; GCF_001542855.1, s__Erythrobacter_A sp001542855, 95.0, 84.35, 0.75; GCF_003355455.1, s__Erythrobacter_A aureus, 95.0, 82.91, 0.68; GCF_000181515.1, s__Erythrobacter_A sp000181515, 95.0, 82.21, 0.61; GCF_009827315.1, s__Erythrobacter_A gaetbuli, 95.0, 81.73, 0.65; GCF_002895025.1, s__Erythrobacter_A sp002895025, 95.0, 81.73, 0.63; GCF_0…	97.02	11	0.995395	Genome not assigned to closest species as it falls outside its pre-defined ANI radius	d__Bacteria	p__Proteobacteria	c__Alphaproteobacteria	o__Sphingomonadales	f__Sphingomonadaceae	g__Erythrobacter_A	s__
LH3_1_150_bin.69	d__Bacteria;p__Proteobacteria;c__Alphaproteobacteria;o__Sphingomonadales;f__Sphingomonadaceae;g__Novosphingopyxis;s__Novosphingopyxis baekryungensis	GCF_000420305.1	95	d__Bacteria;p__Proteobacteria;c__Alphaproteobacteria;o__Sphingomonadales;f__Sphingomonadaceae;g__Novosphingopyxis;s__Novosphingopyxis baekryungensis	96.91	0.97	GCF_000420305.1	95	d__Bacteria;p__Proteobacteria;c__Alphaproteobacteria;o__Sphingomonadales;f__Sphingomonadaceae;g__Novosphingopyxis;s__Novosphingopyxis baekryungensis	96.91	0.97	d__Bacteria;p__Proteobacteria;c__Alphaproteobacteria;o__Sphingomonadales;f__Sphingomonadaceae;g__Novosphingopyxis;s__	taxonomic classification defined by topology and ANI	topological placement and ANI have congruent species assignments	GCF_014334095.1, s__Novosphingopyxis sp002683755, 95.0, 81.58, 0.78	74.49	11	N/A	N/A	d__Bacteria	p__Proteobacteria	c__Alphaproteobacteria	o__Sphingomonadales	f__Sphingomonadaceae	g__Novosphingopyxis	s__Novosphingopyxis baekryungensis
LH1_1_150_bin.68	d__Bacteria;p__Proteobacteria;c__Alphaproteobacteria;o__Sphingomonadales;f__Sphingomonadaceae;g__Sphingobium;s__Sphingobium sp000588875	GCF_000588875.1	95	d__Bacteria;p__Proteobacteria;c__Alphaproteobacteria;o__Sphingomonadales;f__Sphingomonadaceae;g__Sphingobium;s__Sphingobium sp000588875	97.25	0.87	GCF_000588875.1	95	d__Bacteria;p__Proteobacteria;c__Alphaproteobacteria;o__Sphingomonadales;f__Sphingomonadaceae;g__Sphingobium;s__Sphingobium sp000588875	97.25	0.87	d__Bacteria;p__Proteobacteria;c__Alphaproteobacteria;o__Sphingomonadales;f__Sphingomonadaceae;g__Sphingobium;s__	taxonomic classification defined by topology and ANI	topological placement and ANI have congruent species assignments	GCF_002312805.1, s__Sphingobium sp002312805, 95.0, 90.75, 0.81; GCF_001713415.1, s__Sphingobium sp001713415, 95.0, 90.74, 0.81; GCF_003591655.1, s__Sphingobium sp003591655, 95.0, 84.33, 0.71; GCF_000382885.1, s__Sphingobium japonicum_C, 95.0, 83.91, 0.63; GCF_000367345.1, s__Sphingobium xenophagum, 95.0, 83.6, 0.67; GCF_900013425.1, s__Sphingobium sp900013425, 95.0, 83.48, 0.7; GCF_001650725.1, s…	58.09	11	N/A	N/A	d__Bacteria	p__Proteobacteria	c__Alphaproteobacteria	o__Sphingomonadales	f__Sphingomonadaceae	g__Sphingobium	s__Sphingobium sp000588875
LH5_2_200_bin.29	d__Bacteria;p__Proteobacteria;c__Alphaproteobacteria;o__Sphingomonadales;f__Sphingomonadaceae;g__Sphingomonas;s__	N/A	N/A	N/A	N/A	N/A	GCF_006438955.1	95	d__Bacteria;p__Proteobacteria;c__Alphaproteobacteria;o__Sphingomonadales;f__Sphingomonadaceae;g__Sphingomonas;s__Sphingomonas oligophenolica	81.64	0.53	d__Bacteria;p__Proteobacteria;c__Alphaproteobacteria;o__Sphingomonadales;f__Sphingomonadaceae;g__Sphingomonas;s__	taxonomic classification defined by topology and ANI	N/A	GCF_005502745.1, s__Sphingomonas sp005502745, 95.0, 80.16, 0.34; GCF_900109205.1, s__Sphingomonas sp900109205, 95.0, 80.05, 0.31; GCF_000241465.1, s__Sphingomonas echinoides, 95.0, 79.92, 0.37; GCA_003075315.1, s__Sphingomonas sp003075315, 95.0, 79.66, 0.49; GCF_001421535.1, s__Sphingomonas sp001421535, 95.0, 79.6, 0.42; GCF_000632225.1, s__Sphingomonas sp000632225, 95.0, 79.38, 0.46; GCA_0022922…	77.61	11	0.973329	N/A	d__Bacteria	p__Proteobacteria	c__Alphaproteobacteria	o__Sphingomonadales	f__Sphingomonadaceae	g__Sphingomonas	s__
LMG2001_200120_10_bin.29	d__Bacteria;p__Proteobacteria;c__Alphaproteobacteria;o__Thalassobaculales;f__Nisaeaceae;g__;s__	N/A	N/A	N/A	N/A	N/A	N/A	N/A	N/A	N/A	N/A	d__Bacteria;p__Proteobacteria;c__Alphaproteobacteria;o__Thalassobaculales;f__Nisaeaceae;g__;s__	taxonomic classification fully defined by topology	N/A	N/A	65.81	11	0.831887	Genome has more than 11.7% of markers with multiple hits	d__Bacteria	p__Proteobacteria	c__Alphaproteobacteria	o__Thalassobaculales	f__Nisaeaceae	g__	s__
LMG2001_200120_22_bin.21	d__Bacteria;p__Proteobacteria;c__Alphaproteobacteria;o__UBA1280;f__;g__;s__	N/A	N/A	N/A	N/A	N/A	N/A	N/A	N/A	N/A	N/A	d__Bacteria;p__Proteobacteria;c__Alphaproteobacteria;o__UBA1280;f__;g__;s__	taxonomic novelty determined using RED	N/A	N/A	85.19	11	0.659759	N/A	d__Bacteria	p__Proteobacteria	c__Alphaproteobacteria	o__UBA1280	f__	g__	s__
LMG2001_200120_10_bin.63	d__Bacteria;p__Proteobacteria;c__Alphaproteobacteria;o__UBA6615;f__UBA6615;g__;s__	N/A	N/A	N/A	N/A	N/A	N/A	N/A	N/A	N/A	N/A	d__Bacteria;p__Proteobacteria;c__Alphaproteobacteria;o__UBA6615;f__UBA6615;g__;s__	taxonomic classification fully defined by topology	N/A	N/A	86.76	11	0.890568	N/A	d__Bacteria	p__Proteobacteria	c__Alphaproteobacteria	o__UBA6615	f__UBA6615	g__	s__
LMG2001_200120_10_bin.26	d__Bacteria;p__Proteobacteria;c__Alphaproteobacteria;o__UBA8366;f__GCA-2717185;g__;s__	N/A	N/A	N/A	N/A	N/A	N/A	N/A	N/A	N/A	N/A	d__Bacteria;p__Proteobacteria;c__Alphaproteobacteria;o__UBA8366;f__;g__;s__	taxonomic novelty determined using RED	N/A	N/A	95.83	11	0.793803	N/A	d__Bacteria	p__Proteobacteria	c__Alphaproteobacteria	o__UBA8366	f__GCA-2717185	g__	s__
depth7_bin.25	d__Bacteria;p__Proteobacteria;c__Gammaproteobacteria;o__Arenicellales;f__UBA868;g__GCA-2726415;s__	N/A	N/A	N/A	N/A	N/A	GCA_014239255.1	95	d__Bacteria;p__Proteobacteria;c__Gammaproteobacteria;o__Arenicellales;f__UBA868;g__GCA-2726415;s__GCA-2726415 sp014239255	91.63	0.73	d__Bacteria;p__Proteobacteria;c__Gammaproteobacteria;o__Arenicellales;f__UBA868;g__GCA-2726415;s__	taxonomic classification defined by topology and ANI	N/A	GCA_014239575.1, s__GCA-2726415 sp014239575, 95.0, 90.79, 0.63; GCA_002726415.1, s__GCA-2726415 sp002726415, 95.0, 77.13, 0.2	85.53	11	0.98293	Genome not assigned to closest species as it falls outside its pre-defined ANI radius	d__Bacteria	p__Proteobacteria	c__Gammaproteobacteria	o__Arenicellales	f__UBA868	g__GCA-2726415	s__
depth7_bin.7	d__Bacteria;p__Proteobacteria;c__Gammaproteobacteria;o__Arenicellales;f__UBA868;g__REDSEA-S09-B13;s__REDSEA-S09-B13 sp002456995	GCA_002456995.1	95	d__Bacteria;p__Proteobacteria;c__Gammaproteobacteria;o__Arenicellales;f__UBA868;g__REDSEA-S09-B13;s__REDSEA-S09-B13 sp002456995	97.56	0.87	GCA_002456995.1	95	d__Bacteria;p__Proteobacteria;c__Gammaproteobacteria;o__Arenicellales;f__UBA868;g__REDSEA-S09-B13;s__REDSEA-S09-B13 sp002456995	97.56	0.87	d__Bacteria;p__Proteobacteria;c__Gammaproteobacteria;o__Arenicellales;f__UBA868;g__REDSEA-S09-B13;s__	taxonomic classification defined by topology and ANI	topological placement and ANI have congruent species assignments	GCA_002731295.1, s__REDSEA-S09-B13 sp002731295, 95.0, 91.63, 0.8; GCA_001629395.1, s__REDSEA-S09-B13 sp001629395, 95.0, 89.8, 0.77; GCA_003447825.1, s__REDSEA-S09-B13 sp003447825, 95.0, 87.82, 0.8	97.28	11	N/A	N/A	d__Bacteria	p__Proteobacteria	c__Gammaproteobacteria	o__Arenicellales	f__UBA868	g__REDSEA-S09-B13	s__REDSEA-S09-B13 sp002456995
LH3_2_200_bin.48	d__Bacteria;p__Proteobacteria;c__Gammaproteobacteria;o__Arenicellales;f__UBA868;g__UBA11791;s__UBA11791 sp012960345	GCA_012960345.1	95	d__Bacteria;p__Proteobacteria;c__Gammaproteobacteria;o__Arenicellales;f__UBA868;g__UBA11791;s__UBA11791 sp012960345	95.57	0.86	GCA_012960345.1	95	d__Bacteria;p__Proteobacteria;c__Gammaproteobacteria;o__Arenicellales;f__UBA868;g__UBA11791;s__UBA11791 sp012960345	95.57	0.86	d__Bacteria;p__Proteobacteria;c__Gammaproteobacteria;o__Arenicellales;f__UBA868;g__UBA11791;s__	taxonomic classification defined by topology and ANI	topological placement and ANI have congruent species assignments	GCA_002714255.1, s__UBA11791 sp002714255, 95.0, 93.64, 0.88; GCA_012965245.1, s__UBA11791 sp012965245, 95.0, 93.18, 0.82	91.15	11	N/A	N/A	d__Bacteria	p__Proteobacteria	c__Gammaproteobacteria	o__Arenicellales	f__UBA868	g__UBA11791	s__UBA11791 sp012960345
depth6_bin.25	d__Bacteria;p__Proteobacteria;c__Gammaproteobacteria;o__Burkholderiales;f__Burkholderiaceae;g__Paraburkholderia;s__Paraburkholderia fungorum	GCF_902833645.1	95	d__Bacteria;p__Proteobacteria;c__Gammaproteobacteria;o__Burkholderiales;f__Burkholderiaceae;g__Paraburkholderia;s__Paraburkholderia fungorum	96.25	0.81	GCF_902833645.1	95	d__Bacteria;p__Proteobacteria;c__Gammaproteobacteria;o__Burkholderiales;f__Burkholderiaceae;g__Paraburkholderia;s__Paraburkholderia fungorum	96.25	0.81	d__Bacteria;p__Proteobacteria;c__Gammaproteobacteria;o__Burkholderiales;f__Burkholderiaceae;g__Paraburkholderia;s__	taxonomic classification defined by topology and ANI	topological placement and ANI have congruent species assignments	GCF_003610895.1, s__Paraburkholderia fungorum_B, 95.0, 90.63, 0.76; GCF_013177735.1, s__Paraburkholderia sp013177735, 95.0, 90.03, 0.59; GCF_012927345.1, s__Paraburkholderia sp012927345, 95.0, 89.81, 0.66; GCF_001634365.1, s__Paraburkholderia sp001634365, 95.0, 89.7, 0.52; GCF_900142905.1, s__Paraburkholderia sp900142905, 95.0, 89.48, 0.69; GCF_003610295.1, s__Paraburkholderia sp003610295, 95.0, …	77.25	11	N/A	N/A	d__Bacteria	p__Proteobacteria	c__Gammaproteobacteria	o__Burkholderiales	f__Burkholderiaceae	g__Paraburkholderia	s__Paraburkholderia fungorum
LH3_1_5_bin.33	d__Bacteria;p__Proteobacteria;c__Gammaproteobacteria;o__Burkholderiales;f__Methylophilaceae;g__GCA-2401735;s__	N/A	N/A	N/A	N/A	N/A	GCA_002401735.1	95	d__Bacteria;p__Proteobacteria;c__Gammaproteobacteria;o__Burkholderiales;f__Methylophilaceae;g__GCA-2401735;s__GCA-2401735 sp002401735	78.21	0.27	d__Bacteria;p__Proteobacteria;c__Gammaproteobacteria;o__Burkholderiales;f__Methylophilaceae;g__GCA-2401735;s__	taxonomic classification defined by topology and ANI	N/A	GCA_006844635.1, s__GCA-2401735 sp006844635, 95.0, 77.9, 0.29	83.66	11	0.966851	N/A	d__Bacteria	p__Proteobacteria	c__Gammaproteobacteria	o__Burkholderiales	f__Methylophilaceae	g__GCA-2401735	s__
LMG2001_200120_10_bin.28	d__Bacteria;p__Proteobacteria;c__Gammaproteobacteria;o__Burkholderiales;f__Nitrosomonadaceae;g__GCA-2721545;s__	N/A	N/A	N/A	N/A	N/A	GCA_014237605.1	95	d__Bacteria;p__Proteobacteria;c__Gammaproteobacteria;o__Burkholderiales;f__Nitrosomonadaceae;g__GCA-2721545;s__GCA-2721545 sp014237605	91.57	0.86	d__Bacteria;p__Proteobacteria;c__Gammaproteobacteria;o__Burkholderiales;f__Nitrosomonadaceae;g__GCA-2721545;s__	taxonomic classification defined by topology and ANI	N/A	GCA_002721545.1, s__GCA-2721545 sp002721545, 95.0, 80.35, 0.76; GCA_004525885.1, s__GCA-2721545 sp004525885, 95.0, 79.12, 0.5; GCA_003230615.1, s__GCA-2721545 sp003230615, 95.0, 77.53, 0.34; GCA_004356775.1, s__GCA-2721545 sp004356775, 95.0, 77.3, 0.33	92.69	11	0.982356	Genome not assigned to closest species as it falls outside its pre-defined ANI radius	d__Bacteria	p__Proteobacteria	c__Gammaproteobacteria	o__Burkholderiales	f__Nitrosomonadaceae	g__GCA-2721545	s__
LMG2001_200112_7_bin.2	d__Bacteria;p__Proteobacteria;c__Gammaproteobacteria;o__Nevskiales;f__Nevskiaceae;g__Nevskia;s__	N/A	N/A	N/A	N/A	N/A	GCF_000711955.1	95	d__Bacteria;p__Proteobacteria;c__Gammaproteobacteria;o__Nevskiales;f__Nevskiaceae;g__Nevskia;s__Nevskia soli	85.82	0.66	d__Bacteria;p__Proteobacteria;c__Gammaproteobacteria;o__Nevskiales;f__Nevskiaceae;g__Nevskia;s__	taxonomic classification defined by topology and ANI	N/A	GCA_903970595.1, s__Nevskia sp903970595, 95.0, 84.02, 0.54; GCA_903822975.1, s__Nevskia sp903822975, 95.0, 79.16, 0.33; GCA_013823855.1, s__Nevskia sp013823855, 95.0, 78.94, 0.32; GCF_000420645.1, s__Nevskia ramosa, 95.0, 78.85, 0.35; GCA_903885465.1, s__Nevskia sp903885465, 95.0, 78.23, 0.31; GCA_903970615.1, s__Nevskia sp903970615, 95.0, 77.97, 0.24	77.67	11	0.974777	Genome not assigned to closest species as it falls outside its pre-defined ANI radius	d__Bacteria	p__Proteobacteria	c__Gammaproteobacteria	o__Nevskiales	f__Nevskiaceae	g__Nevskia	s__
LH1_2_75_bin.6	d__Bacteria;p__Proteobacteria;c__Gammaproteobacteria;o__PS1;f__Thioglobaceae;g__Thioglobus;s__	N/A	N/A	N/A	N/A	N/A	GCA_014384565.1	95	d__Bacteria;p__Proteobacteria;c__Gammaproteobacteria;o__PS1;f__Thioglobaceae;g__Thioglobus;s__Thioglobus sp014384565	88.82	0.74	d__Bacteria;p__Proteobacteria;c__Gammaproteobacteria;o__PS1;f__Thioglobaceae;g__Thioglobus;s__	taxonomic classification defined by topology and ANI	N/A	GCF_003326015.1, s__Thioglobus singularis_A, 95.0, 80.14, 0.58; GCA_002698045.1, s__Thioglobus sp002698045, 95.0, 79.42, 0.3; GCF_001281385.1, s__Thioglobus singularis, 95.0, 79.22, 0.51; GCA_002711905.1, s__Thioglobus sp002711905, 95.0, 78.89, 0.31; GCA_902514405.1, s__Thioglobus sp902514405, 95.0, 78.37, 0.25; GCA_002729805.1, s__Thioglobus sp002729805, 95.0, 78.29, 0.26; GCA_902512305.1, s__Th…	66.92	11	0.989903	Genome not assigned to closest species as it falls outside its pre-defined ANI radius	d__Bacteria	p__Proteobacteria	c__Gammaproteobacteria	o__PS1	f__Thioglobaceae	g__Thioglobus	s__
LH1_2_35_bin.44	d__Bacteria;p__Proteobacteria;c__Gammaproteobacteria;o__Pseudomonadales;f__Halieaceae;g__Halioglobus;s__	N/A	N/A	N/A	N/A	N/A	GCA_002862985.1	95	d__Bacteria;p__Proteobacteria;c__Gammaproteobacteria;o__Pseudomonadales;f__Halieaceae;g__Halioglobus;s__Halioglobus sp002862985	94.14	0.81	d__Bacteria;p__Proteobacteria;c__Gammaproteobacteria;o__Pseudomonadales;f__Halieaceae;g__Halioglobus;s__	taxonomic classification defined by topology and ANI	N/A	N/A	80.52	11	0.992733	Genome not assigned to closest species as it falls outside its pre-defined ANI radius	d__Bacteria	p__Proteobacteria	c__Gammaproteobacteria	o__Pseudomonadales	f__Halieaceae	g__Halioglobus	s__
LH3_1_75_bin.40	d__Bacteria;p__Proteobacteria;c__Gammaproteobacteria;o__Pseudomonadales;f__Halieaceae;g__Halioglobus;s__	N/A	N/A	N/A	N/A	N/A	GCA_002862465.1	95	d__Bacteria;p__Proteobacteria;c__Gammaproteobacteria;o__Pseudomonadales;f__Halieaceae;g__Halioglobus;s__Halioglobus sp002862465	81.77	0.61	d__Bacteria;p__Proteobacteria;c__Gammaproteobacteria;o__Pseudomonadales;f__Halieaceae;g__Halioglobus;s__	taxonomic classification defined by topology and ANI	N/A	N/A	69.27	11	0.983837	N/A	d__Bacteria	p__Proteobacteria	c__Gammaproteobacteria	o__Pseudomonadales	f__Halieaceae	g__Halioglobus	s__
depth7_bin.57	d__Bacteria;p__Proteobacteria;c__Gammaproteobacteria;o__Pseudomonadales;f__HTCC2089;g__UBA9659;s__UBA9659 sp012961165	GCA_012961165.1	95	d__Bacteria;p__Proteobacteria;c__Gammaproteobacteria;o__Pseudomonadales;f__HTCC2089;g__UBA9659;s__UBA9659 sp012961165	95.26	0.79	GCA_012961165.1	95	d__Bacteria;p__Proteobacteria;c__Gammaproteobacteria;o__Pseudomonadales;f__HTCC2089;g__UBA9659;s__UBA9659 sp012961165	95.26	0.79	d__Bacteria;p__Proteobacteria;c__Gammaproteobacteria;o__Pseudomonadales;f__HTCC2089;g__UBA9659;s__	taxonomic classification defined by topology and ANI	topological placement and ANI have congruent species assignments	N/A	88.74	11	N/A	N/A	d__Bacteria	p__Proteobacteria	c__Gammaproteobacteria	o__Pseudomonadales	f__HTCC2089	g__UBA9659	s__UBA9659 sp012961165
LMG2001_200120_22_bin.1	d__Bacteria;p__Proteobacteria;c__Gammaproteobacteria;o__Pseudomonadales;f__HTCC2089;g__UBA9926;s__	N/A	N/A	N/A	N/A	N/A	N/A	N/A	N/A	N/A	N/A	d__Bacteria;p__Proteobacteria;c__Gammaproteobacteria;o__Pseudomonadales;f__HTCC2089;g__UBA9926;s__	taxonomic classification defined by topology and ANI	N/A	GCA_012960535.1, s__UBA9926 sp012960535, 95.0, 92.85, 0.87; GCA_002697205.1, s__UBA9926 sp002697205, 95.0, 92.24, 0.82	67.26	11	0.994765	Genome not assigned to closest species as it falls outside its pre-defined ANI radius	d__Bacteria	p__Proteobacteria	c__Gammaproteobacteria	o__Pseudomonadales	f__HTCC2089	g__UBA9926	s__
LMG1901_190111_4_bin.1	d__Bacteria;p__Proteobacteria;c__Gammaproteobacteria;o__Pseudomonadales;f__Moraxellaceae;g__Psychrobacter;s__Psychrobacter pacificensis	GCF_900101915.1	96.2282	d__Bacteria;p__Proteobacteria;c__Gammaproteobacteria;o__Pseudomonadales;f__Moraxellaceae;g__Psychrobacter;s__Psychrobacter pacificensis	97.49	0.94	GCF_900101915.1	96.2282	d__Bacteria;p__Proteobacteria;c__Gammaproteobacteria;o__Pseudomonadales;f__Moraxellaceae;g__Psychrobacter;s__Psychrobacter pacificensis	97.49	0.94	d__Bacteria;p__Proteobacteria;c__Gammaproteobacteria;o__Pseudomonadales;f__Moraxellaceae;g__Psychrobacter;s__	taxonomic classification defined by topology and ANI	topological placement and ANI have congruent species assignments	GCF_001444505.1, s__Psychrobacter piscatorii, 96.2282, 96.39, 0.9; GCF_002836735.1, s__Psychrobacter sp002836735, 95.0, 84.93, 0.84; GCF_002836505.1, s__Psychrobacter sp002836505, 95.0, 84.89, 0.85; GCF_002836715.1, s__Psychrobacter sp002836715, 95.0, 84.81, 0.82; GCF_009812035.1, s__Psychrobacter nivimaris, 95.0, 84.72, 0.82; GCF_013414195.1, s__Psychrobacter sp013414195, 95.0, 84.6, 0.83; GCA_0…	93.55	11	N/A	N/A	d__Bacteria	p__Proteobacteria	c__Gammaproteobacteria	o__Pseudomonadales	f__Moraxellaceae	g__Psychrobacter	s__Psychrobacter pacificensis
depth2_bin.9	d__Bacteria;p__Proteobacteria;c__Gammaproteobacteria;o__Pseudomonadales;f__Nitrincolaceae;g__ASP10-02a;s__	N/A	N/A	N/A	N/A	N/A	GCA_002335115.1	95	d__Bacteria;p__Proteobacteria;c__Gammaproteobacteria;o__Pseudomonadales;f__Nitrincolaceae;g__ASP10-02a;s__ASP10-02a sp002335115	94.6	0.81	d__Bacteria;p__Proteobacteria;c__Gammaproteobacteria;o__Pseudomonadales;f__Nitrincolaceae;g__ASP10-02a;s__	taxonomic classification defined by topology and ANI	N/A	GCA_002312935.1, s__ASP10-02a sp002312935, 95.0, 79.15, 0.47; GCA_002470565.1, s__ASP10-02a sp002470565, 95.0, 78.0, 0.34; GCA_003523085.1, s__ASP10-02a sp003523085, 95.0, 77.84, 0.26	76.16	11	0.99397	Genome not assigned to closest species as it falls outside its pre-defined ANI radius	d__Bacteria	p__Proteobacteria	c__Gammaproteobacteria	o__Pseudomonadales	f__Nitrincolaceae	g__ASP10-02a	s__
LH1_1_150_bin.51	d__Bacteria;p__Proteobacteria;c__Gammaproteobacteria;o__Pseudomonadales;f__Nitrincolaceae;g__ASP10-02a;s__ASP10-02a sp002312935	GCA_002312935.1	95	d__Bacteria;p__Proteobacteria;c__Gammaproteobacteria;o__Pseudomonadales;f__Nitrincolaceae;g__ASP10-02a;s__ASP10-02a sp002312935	98.66	0.81	GCA_002312935.1	95	d__Bacteria;p__Proteobacteria;c__Gammaproteobacteria;o__Pseudomonadales;f__Nitrincolaceae;g__ASP10-02a;s__ASP10-02a sp002312935	98.66	0.81	d__Bacteria;p__Proteobacteria;c__Gammaproteobacteria;o__Pseudomonadales;f__Nitrincolaceae;g__ASP10-02a;s__	taxonomic classification defined by topology and ANI	topological placement and ANI have congruent species assignments	GCA_002470565.1, s__ASP10-02a sp002470565, 95.0, 79.57, 0.51; GCA_002335115.1, s__ASP10-02a sp002335115, 95.0, 78.89, 0.38; GCA_003523085.1, s__ASP10-02a sp003523085, 95.0, 78.36, 0.25	76.06	11	N/A	N/A	d__Bacteria	p__Proteobacteria	c__Gammaproteobacteria	o__Pseudomonadales	f__Nitrincolaceae	g__ASP10-02a	s__ASP10-02a sp002312935
LMG2001_200120_21_bin.68	d__Bacteria;p__Proteobacteria;c__Gammaproteobacteria;o__Pseudomonadales;f__Porticoccaceae;g__HTCC2207;s__	N/A	N/A	N/A	N/A	N/A	GCA_002382445.1	95	d__Bacteria;p__Proteobacteria;c__Gammaproteobacteria;o__Pseudomonadales;f__Porticoccaceae;g__HTCC2207;s__HTCC2207 sp002382445	88.34	0.78	d__Bacteria;p__Proteobacteria;c__Gammaproteobacteria;o__Pseudomonadales;f__Porticoccaceae;g__HTCC2207;s__	taxonomic classification defined by topology and ANI	N/A	GCA_014381985.1, s__HTCC2207 sp014381985, 95.0, 82.38, 0.68; GCA_012960115.1, s__HTCC2207 sp012960115, 95.0, 82.31, 0.67	86.94	11	0.983638	Genome not assigned to closest species as it falls outside its pre-defined ANI radius	d__Bacteria	p__Proteobacteria	c__Gammaproteobacteria	o__Pseudomonadales	f__Porticoccaceae	g__HTCC2207	s__
LMG2001_200120_16_bin.28	d__Bacteria;p__Proteobacteria;c__Gammaproteobacteria;o__Pseudomonadales;f__Porticoccaceae;g__HTCC2207;s__HTCC2207 sp002313335	GCA_002313335.1	95	d__Bacteria;p__Proteobacteria;c__Gammaproteobacteria;o__Pseudomonadales;f__Porticoccaceae;g__HTCC2207;s__HTCC2207 sp002313335	95.18	0.79	GCA_002313335.1	95	d__Bacteria;p__Proteobacteria;c__Gammaproteobacteria;o__Pseudomonadales;f__Porticoccaceae;g__HTCC2207;s__HTCC2207 sp002313335	95.18	0.79	d__Bacteria;p__Proteobacteria;c__Gammaproteobacteria;o__Pseudomonadales;f__Porticoccaceae;g__HTCC2207;s__	taxonomic classification defined by topology and ANI	topological placement and ANI have congruent species assignments	GCA_014381985.1, s__HTCC2207 sp014381985, 95.0, 79.03, 0.21; GCA_012960115.1, s__HTCC2207 sp012960115, 95.0, 78.18, 0.19	98.37	11	N/A	N/A	d__Bacteria	p__Proteobacteria	c__Gammaproteobacteria	o__Pseudomonadales	f__Porticoccaceae	g__HTCC2207	s__HTCC2207 sp002313335
LH5_1_75_bin.53	d__Bacteria;p__Proteobacteria;c__Gammaproteobacteria;o__Pseudomonadales;f__Porticoccaceae;g__HTCC2207;s__HTCC2207 sp014381985	GCA_014381985.1	95	d__Bacteria;p__Proteobacteria;c__Gammaproteobacteria;o__Pseudomonadales;f__Porticoccaceae;g__HTCC2207;s__HTCC2207 sp014381985	95.06	0.83	GCA_014381985.1	95	d__Bacteria;p__Proteobacteria;c__Gammaproteobacteria;o__Pseudomonadales;f__Porticoccaceae;g__HTCC2207;s__HTCC2207 sp014381985	95.06	0.83	d__Bacteria;p__Proteobacteria;c__Gammaproteobacteria;o__Pseudomonadales;f__Porticoccaceae;g__HTCC2207;s__	taxonomic classification defined by topology and ANI	topological placement and ANI have congruent species assignments	GCA_012960115.1, s__HTCC2207 sp012960115, 95.0, 92.1, 0.81; GCA_002382445.1, s__HTCC2207 sp002382445, 95.0, 81.47, 0.67	82.67	11	N/A	N/A	d__Bacteria	p__Proteobacteria	c__Gammaproteobacteria	o__Pseudomonadales	f__Porticoccaceae	g__HTCC2207	s__HTCC2207 sp014381985
LH5_3_35_bin.64	d__Bacteria;p__Proteobacteria;c__Gammaproteobacteria;o__Pseudomonadales;f__Porticoccaceae;g__TMED48;s__	N/A	N/A	N/A	N/A	N/A	GCA_002339165.1	95	d__Bacteria;p__Proteobacteria;c__Gammaproteobacteria;o__Pseudomonadales;f__Porticoccaceae;g__TMED48;s__TMED48 sp002339165	77.73	0.32	d__Bacteria;p__Proteobacteria;c__Gammaproteobacteria;o__Pseudomonadales;f__Porticoccaceae;g__TMED48;s__	taxonomic classification defined by topology and ANI	N/A	N/A	70.64	11	0.951988	N/A	d__Bacteria	p__Proteobacteria	c__Gammaproteobacteria	o__Pseudomonadales	f__Porticoccaceae	g__TMED48	s__
LMG2001_200120_18_bin.29	d__Bacteria;p__Proteobacteria;c__Gammaproteobacteria;o__Pseudomonadales;f__Porticoccaceae;g__TMED48;s__TMED48 sp002339165	GCA_002339165.1	95	d__Bacteria;p__Proteobacteria;c__Gammaproteobacteria;o__Pseudomonadales;f__Porticoccaceae;g__TMED48;s__TMED48 sp002339165	99.64	0.87	GCA_002339165.1	95	d__Bacteria;p__Proteobacteria;c__Gammaproteobacteria;o__Pseudomonadales;f__Porticoccaceae;g__TMED48;s__TMED48 sp002339165	99.64	0.87	d__Bacteria;p__Proteobacteria;c__Gammaproteobacteria;o__Pseudomonadales;f__Porticoccaceae;g__TMED48;s__	taxonomic classification defined by topology and ANI	topological placement and ANI have congruent species assignments	N/A	95.41	11	N/A	N/A	d__Bacteria	p__Proteobacteria	c__Gammaproteobacteria	o__Pseudomonadales	f__Porticoccaceae	g__TMED48	s__TMED48 sp002339165
depth6_bin.58	d__Bacteria;p__Proteobacteria;c__Gammaproteobacteria;o__Pseudomonadales;f__Pseudohongiellaceae;g__UBA9145;s__	N/A	N/A	N/A	N/A	N/A	GCA_002401885.1	95	d__Bacteria;p__Proteobacteria;c__Gammaproteobacteria;o__Pseudomonadales;f__Pseudohongiellaceae;g__UBA9145;s__UBA9145 sp002401885	86.2	0.76	d__Bacteria;p__Proteobacteria;c__Gammaproteobacteria;o__Pseudomonadales;f__Pseudohongiellaceae;g__UBA9145;s__	taxonomic classification defined by topology and ANI	N/A	GCA_003483155.1, s__UBA9145 sp003483155, 95.0, 77.98, 0.36	90.31	11	0.987903	Genome not assigned to closest species as it falls outside its pre-defined ANI radius	d__Bacteria	p__Proteobacteria	c__Gammaproteobacteria	o__Pseudomonadales	f__Pseudohongiellaceae	g__UBA9145	s__
LMG2001_200120_22_bin.59	d__Bacteria;p__Proteobacteria;c__Gammaproteobacteria;o__Pseudomonadales;f__Pseudohongiellaceae;g__UBA9145;s__UBA9145 sp012960305	GCA_012960305.1	95	d__Bacteria;p__Proteobacteria;c__Gammaproteobacteria;o__Pseudomonadales;f__Pseudohongiellaceae;g__UBA9145;s__UBA9145 sp012960305	97.42	0.91	GCA_012960305.1	95	d__Bacteria;p__Proteobacteria;c__Gammaproteobacteria;o__Pseudomonadales;f__Pseudohongiellaceae;g__UBA9145;s__UBA9145 sp012960305	97.42	0.91	d__Bacteria;p__Proteobacteria;c__Gammaproteobacteria;o__Pseudomonadales;f__Pseudohongiellaceae;g__UBA9145;s__	taxonomic classification defined by topology and ANI	topological placement and ANI have congruent species assignments	N/A	98.21	11	N/A	N/A	d__Bacteria	p__Proteobacteria	c__Gammaproteobacteria	o__Pseudomonadales	f__Pseudohongiellaceae	g__UBA9145	s__UBA9145 sp012960305
LMG2001_200120_22_bin.10	d__Bacteria;p__Proteobacteria;c__Gammaproteobacteria;o__Woeseiales;f__Woeseiaceae;g__SP4260;s__	N/A	N/A	N/A	N/A	N/A	N/A	N/A	N/A	N/A	N/A	d__Bacteria;p__Proteobacteria;c__Gammaproteobacteria;o__Woeseiales;f__Woeseiaceae;g__SP4260;s__	ANI	N/A	GCA_902512585.1, s__SP4260 sp902512585, 95.0, 77.79, 0.25; GCA_902510755.1, s__SP4260 sp902510755, 95.0, 77.36, 0.24	89.34	11	0.931234	N/A	d__Bacteria	p__Proteobacteria	c__Gammaproteobacteria	o__Woeseiales	f__Woeseiaceae	g__SP4260	s__
LMG2001_200120_21_bin.41	d__Bacteria;p__Proteobacteria;c__Gammaproteobacteria;o__Woeseiales;f__Woeseiaceae;g__SZUA-117;s__	N/A	N/A	N/A	N/A	N/A	N/A	N/A	N/A	N/A	N/A	d__Bacteria;p__Proteobacteria;c__Gammaproteobacteria;o__Woeseiales;f__Woeseiaceae;g__SZUA-117;s__	taxonomic classification fully defined by topology	N/A	N/A	95.33	11	0.927915	N/A	d__Bacteria	p__Proteobacteria	c__Gammaproteobacteria	o__Woeseiales	f__Woeseiaceae	g__SZUA-117	s__
LMG2001_200120_10_bin.58	d__Bacteria;p__Proteobacteria;c__Gammaproteobacteria;o__Woeseiales;f__Woeseiaceae;g__UBA1847;s__	N/A	N/A	N/A	N/A	N/A	GCA_002685275.1	95	d__Bacteria;p__Proteobacteria;c__Gammaproteobacteria;o__Woeseiales;f__Woeseiaceae;g__UBA1847;s__UBA1847 sp002685275	N/A	N/A	d__Bacteria;p__Proteobacteria;c__Gammaproteobacteria;o__Woeseiales;f__Woeseiaceae;g__UBA1847;s__	taxonomic classification defined by topology and ANI	N/A	GCA_009937445.1, s__UBA1847 sp009937445, 95.0, 77.0, 0.22	92.28	11	0.950193	N/A	d__Bacteria	p__Proteobacteria	c__Gammaproteobacteria	o__Woeseiales	f__Woeseiaceae	g__UBA1847	s__
LMG2001_200120_10_bin.61	d__Bacteria;p__SAR324;c__SAR324;o__SAR324;f__NAC60-12;g__Arctic96AD-7;s__	N/A	N/A	N/A	N/A	N/A	GCA_014381795.1	95	d__Bacteria;p__SAR324;c__SAR324;o__SAR324;f__NAC60-12;g__Arctic96AD-7;s__Arctic96AD-7 sp014381795	93.71	0.64	d__Bacteria;p__SAR324;c__SAR324;o__SAR324;f__NAC60-12;g__Arctic96AD-7;s__	taxonomic classification defined by topology and ANI	N/A	GCA_002685535.1, s__Arctic96AD-7 sp002685535, 95.0, 88.09, 0.8; GCA_002704555.1, s__Arctic96AD-7 sp002704555, 95.0, 82.75, 0.59; GCA_003212435.1, s__Arctic96AD-7 sp003212435, 95.0, 82.44, 0.48; GCA_012964265.1, s__Arctic96AD-7 sp012964265, 95.0, 80.24, 0.57; GCA_002082305.1, s__Arctic96AD-7 sp002082305, 95.0, 78.84, 0.52; GCA_902513935.1, s__Arctic96AD-7 sp902513935, 95.0, 78.71, 0.25; GCA_000213…	85.86	11	0.979531	Genome not assigned to closest species as it falls outside its pre-defined ANI radius	d__Bacteria	p__SAR324	c__SAR324	o__SAR324	f__NAC60-12	g__Arctic96AD-7	s__
LMG2001_200120_10_bin.60	d__Bacteria;p__SAR324;c__SAR324;o__SAR324;f__NAC60-12;g__Arctic96AD-7;s__Arctic96AD-7 sp002082305	GCA_002082305.1	95	d__Bacteria;p__SAR324;c__SAR324;o__SAR324;f__NAC60-12;g__Arctic96AD-7;s__Arctic96AD-7 sp002082305	95.89	0.89	N/A	N/A	N/A	N/A	N/A	d__Bacteria;p__SAR324;c__SAR324;o__SAR324;f__NAC60-12;g__Arctic96AD-7;s__	ANI	topological placement and ANI have incongruent species assignments	GCA_002082305.1, s__Arctic96AD-7 sp002082305, 95.0, 95.89, 0.89; GCA_000213335.2, s__Arctic96AD-7 sp000213335, 95.0, 94.56, 0.46; GCA_902513935.1, s__Arctic96AD-7 sp902513935, 95.0, 93.22, 0.5; GCA_012964265.1, s__Arctic96AD-7 sp012964265, 95.0, 78.99, 0.47; GCA_002685535.1, s__Arctic96AD-7 sp002685535, 95.0, 78.67, 0.46; GCA_014381795.1, s__Arctic96AD-7 sp014381795, 95.0, 78.53, 0.35; GCA_014382…	89.95	11	N/A	N/A	d__Bacteria	p__SAR324	c__SAR324	o__SAR324	f__NAC60-12	g__Arctic96AD-7	s__Arctic96AD-7 sp002082305
LH3_2_200_bin.65	d__Bacteria;p__SAR324;c__SAR324;o__SAR324;f__NAC60-12;g__UBA8110;s__UBA8110 sp002707655	GCA_002707655.1	95	d__Bacteria;p__SAR324;c__SAR324;o__SAR324;f__NAC60-12;g__UBA8110;s__UBA8110 sp002707655	98.73	0.84	GCA_002707655.1	95	d__Bacteria;p__SAR324;c__SAR324;o__SAR324;f__NAC60-12;g__UBA8110;s__UBA8110 sp002707655	98.73	0.84	d__Bacteria;p__SAR324;c__SAR324;o__SAR324;f__NAC60-12;g__UBA8110;s__	taxonomic classification defined by topology and ANI	topological placement and ANI have congruent species assignments	GCA_002726945.1, s__UBA8110 sp002726945, 95.0, 88.53, 0.68	90.89	11	N/A	N/A	d__Bacteria	p__SAR324	c__SAR324	o__SAR324	f__NAC60-12	g__UBA8110	s__UBA8110 sp002707655
LMG2001_200112_7_bin.32	d__Bacteria;p__Verrucomicrobiota;c__Kiritimatiellae;o__UBA8416;f__JABMPJ01;g__;s__	N/A	N/A	N/A	N/A	N/A	N/A	N/A	N/A	N/A	N/A	d__Bacteria;p__Verrucomicrobiota;c__Kiritimatiellae;o__UBA8416;f__;g__;s__	taxonomic novelty determined using RED	N/A	N/A	67.26	11	0.710899	N/A	d__Bacteria	p__Verrucomicrobiota	c__Kiritimatiellae	o__UBA8416	f__JABMPJ01	g__	s__
LMG2001_200115_16_bin.23	d__Bacteria;p__Verrucomicrobiota;c__Verrucomicrobiae;o__Opitutales;f__;g__;s__	N/A	N/A	N/A	N/A	N/A	N/A	N/A	N/A	N/A	N/A	d__Bacteria;p__Verrucomicrobiota;c__Verrucomicrobiae;o__Opitutales;f__;g__;s__	taxonomic novelty determined using RED	N/A	N/A	56.44	11	0.741883	N/A	d__Bacteria	p__Verrucomicrobiota	c__Verrucomicrobiae	o__Opitutales	f__	g__	s__
LMG2001_200120_22_bin.78	d__Bacteria;p__Verrucomicrobiota;c__Verrucomicrobiae;o__Opitutales;f__MB11C04;g__GCA-2730975;s__	N/A	N/A	N/A	N/A	N/A	GCA_014382645.1	95	d__Bacteria;p__Verrucomicrobiota;c__Verrucomicrobiae;o__Opitutales;f__MB11C04;g__GCA-2730975;s__GCA-2730975 sp014382645	90.16	0.68	d__Bacteria;p__Verrucomicrobiota;c__Verrucomicrobiae;o__Opitutales;f__MB11C04;g__GCA-2730975;s__	taxonomic classification defined by topology and ANI	N/A	GCA_002730975.1, s__GCA-2730975 sp002730975, 95.0, 87.63, 0.75	84.26	11	0.974294	Genome not assigned to closest species as it falls outside its pre-defined ANI radius	d__Bacteria	p__Verrucomicrobiota	c__Verrucomicrobiae	o__Opitutales	f__MB11C04	g__GCA-2730975	s__
LMG2001_200120_10_bin.78	d__Bacteria;p__Verrucomicrobiota;c__Verrucomicrobiae;o__Opitutales;f__Opitutaceae;g__UBA5691;s__	N/A	N/A	N/A	N/A	N/A	N/A	N/A	N/A	N/A	N/A	d__Bacteria;p__Verrucomicrobiota;c__Verrucomicrobiae;o__Opitutales;f__Opitutaceae;g__UBA5691;s__	taxonomic classification fully defined by topology	N/A	N/A	84.93	11	0.95022	N/A	d__Bacteria	p__Verrucomicrobiota	c__Verrucomicrobiae	o__Opitutales	f__Opitutaceae	g__UBA5691	s__
LH5_1_75_bin.8	d__Bacteria;p__Verrucomicrobiota;c__Verrucomicrobiae;o__Pedosphaerales;f__UBA1096;g__UBA1096;s__	N/A	N/A	N/A	N/A	N/A	GCA_002299785.1	95	d__Bacteria;p__Verrucomicrobiota;c__Verrucomicrobiae;o__Pedosphaerales;f__UBA1096;g__UBA1096;s__UBA1096 sp002299785	92.17	0.76	d__Bacteria;p__Verrucomicrobiota;c__Verrucomicrobiae;o__Pedosphaerales;f__UBA1096;g__UBA1096;s__	taxonomic classification defined by topology and ANI	N/A	GCA_003972865.1, s__UBA1096 sp003972865, 95.0, 86.56, 0.68; GCA_014382705.1, s__UBA1096 sp014382705, 95.0, 83.38, 0.71; GCA_002686755.1, s__UBA1096 sp002686755, 95.0, 82.0, 0.59; GCA_011523195.1, s__UBA1096 sp011523195, 95.0, 78.37, 0.42; GCA_002453165.1, s__UBA1096 sp002453165, 95.0, 78.24, 0.38; GCA_002689335.1, s__UBA1096 sp002689335, 95.0, 77.31, 0.32	83.98	11	0.989431	Genome not assigned to closest species as it falls outside its pre-defined ANI radius	d__Bacteria	p__Verrucomicrobiota	c__Verrucomicrobiae	o__Pedosphaerales	f__UBA1096	g__UBA1096	s__
LMG2001_200112_7_bin.46	d__Bacteria;p__Verrucomicrobiota;c__Verrucomicrobiae;o__Pedosphaerales;f__UBA1096;g__UBA1096;s__	N/A	N/A	N/A	N/A	N/A	GCA_002299785.1	95	d__Bacteria;p__Verrucomicrobiota;c__Verrucomicrobiae;o__Pedosphaerales;f__UBA1096;g__UBA1096;s__UBA1096 sp002299785	91.05	0.72	d__Bacteria;p__Verrucomicrobiota;c__Verrucomicrobiae;o__Pedosphaerales;f__UBA1096;g__UBA1096;s__	taxonomic classification defined by topology and ANI	N/A	GCA_003972865.1, s__UBA1096 sp003972865, 95.0, 88.68, 0.65; GCA_014382705.1, s__UBA1096 sp014382705, 95.0, 84.95, 0.79; GCA_002686755.1, s__UBA1096 sp002686755, 95.0, 83.38, 0.67; GCA_011523195.1, s__UBA1096 sp011523195, 95.0, 78.86, 0.43; GCA_002453165.1, s__UBA1096 sp002453165, 95.0, 78.77, 0.42; GCA_002689335.1, s__UBA1096 sp002689335, 95.0, 78.2, 0.34; GCA_002721375.1, s__UBA1096 sp002721375,…	83.62	11	0.982119	Genome not assigned to closest species as it falls outside its pre-defined ANI radius	d__Bacteria	p__Verrucomicrobiota	c__Verrucomicrobiae	o__Pedosphaerales	f__UBA1096	g__UBA1096	s__
LMG2001_200120_10_bin.24	d__Bacteria;p__Verrucomicrobiota;c__Verrucomicrobiae;o__Pedosphaerales;f__UBA1100;g__JACNJL01;s__	N/A	N/A	N/A	N/A	N/A	N/A	N/A	N/A	N/A	N/A	d__Bacteria;p__Verrucomicrobiota;c__Verrucomicrobiae;o__Pedosphaerales;f__UBA1100;g__;s__	taxonomic novelty determined using RED	N/A	N/A	83.32	11	0.951869	N/A	d__Bacteria	p__Verrucomicrobiota	c__Verrucomicrobiae	o__Pedosphaerales	f__UBA1100	g__JACNJL01	s__
LMG2001_200120_21_bin.60	d__Bacteria;p__Verrucomicrobiota;c__Verrucomicrobiae;o__Pedosphaerales;f__UBA1100;g__JACNJL01;s__	N/A	N/A	N/A	N/A	N/A	N/A	N/A	N/A	N/A	N/A	d__Bacteria;p__Verrucomicrobiota;c__Verrucomicrobiae;o__Pedosphaerales;f__UBA1100;g__;s__	taxonomic novelty determined using RED	N/A	N/A	84	11	0.950126	N/A	d__Bacteria	p__Verrucomicrobiota	c__Verrucomicrobiae	o__Pedosphaerales	f__UBA1100	g__JACNJL01	s__
LMG2001_200112_7_bin.36	d__Bacteria;p__Verrucomicrobiota;c__Verrucomicrobiae;o__Verrucomicrobiales;f__Akkermansiaceae;g__;s__	N/A	N/A	N/A	N/A	N/A	N/A	N/A	N/A	N/A	N/A	d__Bacteria;p__Verrucomicrobiota;c__Verrucomicrobiae;o__Verrucomicrobiales;f__Akkermansiaceae;g__;s__	taxonomic novelty determined using RED	N/A	N/A	90.51	11	0.869971	N/A	d__Bacteria	p__Verrucomicrobiota	c__Verrucomicrobiae	o__Verrucomicrobiales	f__Akkermansiaceae	g__	s__
LMG2001_200120_22_bin.68	d__Bacteria;p__Verrucomicrobiota;c__Verrucomicrobiae;o__Verrucomicrobiales;f__Akkermansiaceae;g__Roseibacillus_B;s__	N/A	N/A	N/A	N/A	N/A	N/A	N/A	N/A	N/A	N/A	d__Bacteria;p__Verrucomicrobiota;c__Verrucomicrobiae;o__Verrucomicrobiales;f__Akkermansiaceae;g__Roseibacillus_B;s__	ANI	N/A	GCA_002501065.1, s__Roseibacillus_B sp002501065, 95.0, 78.65, 0.26; GCA_014240355.1, s__Roseibacillus_B sp014240355, 95.0, 78.05, 0.28; GCA_003483645.1, s__Roseibacillus_B sp003483645, 95.0, 77.68, 0.27	90.59	11	0.916452	N/A	d__Bacteria	p__Verrucomicrobiota	c__Verrucomicrobiae	o__Verrucomicrobiales	f__Akkermansiaceae	g__Roseibacillus_B	s__
LH5_3_35_bin.55	d__Bacteria;p__Verrucomicrobiota;c__Verrucomicrobiae;o__Verrucomicrobiales;f__Akkermansiaceae;g__SW10;s__	N/A	N/A	N/A	N/A	N/A	N/A	N/A	N/A	N/A	N/A	d__Bacteria;p__Verrucomicrobiota;c__Verrucomicrobiae;o__Verrucomicrobiales;f__Akkermansiaceae;g__;s__	taxonomic novelty determined using RED	N/A	N/A	90.63	11	0.92673	N/A	d__Bacteria	p__Verrucomicrobiota	c__Verrucomicrobiae	o__Verrucomicrobiales	f__Akkermansiaceae	g__SW10	s__
LMG2001_200120_10_bin.21	d__Bacteria;p__Verrucomicrobiota;c__Verrucomicrobiae;o__Verrucomicrobiales;f__Akkermansiaceae;g__SW10;s__	N/A	N/A	N/A	N/A	N/A	N/A	N/A	N/A	N/A	N/A	d__Bacteria;p__Verrucomicrobiota;c__Verrucomicrobiae;o__Verrucomicrobiales;f__Akkermansiaceae;g__SW10;s__	taxonomic classification fully defined by topology	N/A	N/A	83.64	11	0.969074	N/A	d__Bacteria	p__Verrucomicrobiota	c__Verrucomicrobiae	o__Verrucomicrobiales	f__Akkermansiaceae	g__SW10	s__
LMG2001_200112_7_bin.22	d__Bacteria;p__Verrucomicrobiota;c__Verrucomicrobiae;o__Verrucomicrobiales;f__Akkermansiaceae;g__UBA1315;s__	N/A	N/A	N/A	N/A	N/A	GCA_014379305.1	95	d__Bacteria;p__Verrucomicrobiota;c__Verrucomicrobiae;o__Verrucomicrobiales;f__Akkermansiaceae;g__UBA1315;s__UBA1315 sp014379305	77.17	0.22	d__Bacteria;p__Verrucomicrobiota;c__Verrucomicrobiae;o__Verrucomicrobiales;f__Akkermansiaceae;g__UBA1315;s__	taxonomic classification defined by topology and ANI	N/A	N/A	91.84	11	0.960356	N/A	d__Bacteria	p__Verrucomicrobiota	c__Verrucomicrobiae	o__Verrucomicrobiales	f__Akkermansiaceae	g__UBA1315	s__
LMG2001_200120_22_bin.71	d__Bacteria;p__Verrucomicrobiota;c__Verrucomicrobiae;o__Verrucomicrobiales;f__DEV007;g__EC70;s__EC70 sp012960505	GCA_012960505.1	95	d__Bacteria;p__Verrucomicrobiota;c__Verrucomicrobiae;o__Verrucomicrobiales;f__DEV007;g__EC70;s__EC70 sp012960505	97.26	0.95	GCA_012960505.1	95	d__Bacteria;p__Verrucomicrobiota;c__Verrucomicrobiae;o__Verrucomicrobiales;f__DEV007;g__EC70;s__EC70 sp012960505	97.26	0.95	d__Bacteria;p__Verrucomicrobiota;c__Verrucomicrobiae;o__Verrucomicrobiales;f__DEV007;g__EC70;s__	taxonomic classification defined by topology and ANI	topological placement and ANI have congruent species assignments	GCA_014239335.1, s__EC70 sp014239335, 95.0, 90.6, 0.73; GCA_902591645.1, s__EC70 sp902591645, 95.0, 88.46, 0.67; GCA_013213965.1, s__EC70 sp013213965, 95.0, 87.64, 0.77; GCA_004211885.1, s__EC70 sp004211885, 95.0, 87.05, 0.75; GCA_002708885.1, s__EC70 sp002708885, 95.0, 81.91, 0.69	72.84	11	N/A	N/A	d__Bacteria	p__Verrucomicrobiota	c__Verrucomicrobiae	o__Verrucomicrobiales	f__DEV007	g__EC70	s__EC70 sp012960505
